# Supplementary material for: Swietemicrolides A–D, mexicanolide-type limonoids from the bark of Swietenia macrophylla with in vitro cytotoxic and α-glucosidase inhibitory activities
Source: Royal Society of Chemistry journal article supplement (doi:10.1039/d4ra01954g), 2024-01-01
Supplement: d4ra01954g1.pdf [file d4ra01954g1.pdf]

## Supporting Information

### **Swietemicrolides A–D, mexicanolide-type limonoids from the bark of *Swietenia microphylla* with *in vitro* cytotoxic and $\alpha$ -glucosidase inhibitory activities**

Tu-Quyen Thi Tran,<sup>a,b</sup> Duong Hoang Trinh,<sup>c</sup> Binh Thi Dieu Trinh,<sup>a,b</sup> Dzung Ngoc Bui,<sup>a,b</sup>  
Lien-Hoa Dieu Nguyen,<sup>a,b</sup> Phuong Thu Tran<sup>\*a,b</sup>

<sup>a</sup>*Faculty of Chemistry, University of Science – Ho Chi Minh City – Vietnam, 227 Nguyen Van Cu Street, District 5, 700000 Ho Chi Minh City, Vietnam*

<sup>b</sup>*Vietnam National University – Ho Chi Minh City, Linh Trung Ward, Thu Duc City, 700000 Ho Chi Minh City, Vietnam*

<sup>c</sup>*Institute of Drug Quality Control, 200 Co Bac Street, District 1, 700000 Ho Chi Minh City, Vietnam*

#### **Corresponding author:**

\*E-mail address: [tphuong@hcmus.edu.vn](mailto:tphuong@hcmus.edu.vn)

## Table of Contents

|                                                                                                                                                                                    |    |
|------------------------------------------------------------------------------------------------------------------------------------------------------------------------------------|----|
| <b>Table S1.</b> $^1\text{H}$ (500 MHz) and $^{13}\text{C}$ (125 MHz) NMR data for swiemahogin A ( <b>5</b> ) in acetone- $d_6$ .....                                              | 4  |
| <b>Table S2.</b> $^1\text{H}$ (500 MHz) and $^{13}\text{C}$ (125 MHz) NMR data for $\beta$ -sitosterol-3- <i>O</i> - $\beta$ -D-glucopyranoside ( <b>6</b> ) pyridine- $d_5$ ..... | 5  |
| <b>Table S3.</b> $^1\text{H}$ (500 MHz) and $^{13}\text{C}$ (125 MHz) NMR data for homovanillyl alcohol ( <b>7</b> ) in acetone- $d_6$ .....                                       | 7  |
| <b>Figure S1.</b> UV spectrum of swetemicrolide A ( <b>1</b> ). .....                                                                                                              | 8  |
| <b>Figure S2.</b> IR spectrum of swetemicrolide A ( <b>1</b> ). .....                                                                                                              | 8  |
| <b>Figure S3.</b> HRESIMS spectrum of swetemicrolide A ( <b>1</b> ).....                                                                                                           | 8  |
| <b>Figure S4.</b> $^1\text{H}$ NMR spectrum of swetemicrolide A ( <b>1</b> ) in $\text{CDCl}_3$ (500MHz).....                                                                      | 9  |
| <b>Figure S5.</b> $^{13}\text{C}$ NMR spectrum of swetemicrolide A ( <b>1</b> ) in $\text{CDCl}_3$ (125MHz) .....                                                                  | 9  |
| <b>Figure S6.</b> HSQC spectrum of swetemicrolide A ( <b>1</b> ) in $\text{CDCl}_3$ .....                                                                                          | 10 |
| <b>Figure S7.</b> HMBC spectrum of swetemicrolide A ( <b>1</b> ) in $\text{CDCl}_3$ .....                                                                                          | 10 |
| <b>Figure S8.</b> $^1\text{H}$ – $^1\text{H}$ COSY spectrum of swetemicrolide A ( <b>1</b> ) in $\text{CDCl}_3$ .....                                                              | 11 |
| <b>Figure S9.</b> NOESY spectrum of swetemicrolide A ( <b>1</b> ) in $\text{CDCl}_3$ .....                                                                                         | 11 |
| <b>Figure S10.</b> UV spectrum of swetemicrolide B ( <b>2</b> ). .....                                                                                                             | 12 |
| <b>Figure S11.</b> IR spectrum of swetemicrolide B ( <b>2</b> ). .....                                                                                                             | 12 |
| <b>Figure S12.</b> HRESIMS spectrum of swetemicrolide B ( <b>2</b> ). .....                                                                                                        | 12 |
| <b>Figure S13.</b> $^1\text{H}$ NMR spectrum of swetemicrolide B ( <b>2</b> ) in $\text{CDCl}_3$ (500MHz) .....                                                                    | 13 |
| <b>Figure S14.</b> $^{13}\text{C}$ NMR spectrum of swetemicrolide B ( <b>2</b> ) in $\text{CDCl}_3$ (125MHz) .....                                                                 | 13 |
| <b>Figure S15.</b> HSQC spectrum of swetemicrolide B ( <b>2</b> ) in $\text{CDCl}_3$ .....                                                                                         | 14 |
| <b>Figure S16.</b> HMBC spectrum of swetemicrolide B ( <b>2</b> ) in $\text{CDCl}_3$ .....                                                                                         | 14 |
| <b>Figure S17.</b> $^1\text{H}$ – $^1\text{H}$ COSY spectrum of swetemicrolide B ( <b>2</b> ) in $\text{CDCl}_3$ .....                                                             | 15 |
| <b>Figure S18.</b> NOESY spectrum of swetemicrolide B ( <b>2</b> ) in $\text{CDCl}_3$ .....                                                                                        | 15 |
| <b>Figure S19.</b> UV spectrum of swetemicrolide C ( <b>3</b> ). .....                                                                                                             | 16 |
| <b>Figure S20.</b> IR spectrum of swetemicrolide C ( <b>3</b> ). .....                                                                                                             | 16 |
| <b>Figure S21.</b> HRESIMS spectrum of swetemicrolide C ( <b>3</b> ). .....                                                                                                        | 16 |
| <b>Figure S22.</b> $^1\text{H}$ NMR spectrum of swetemicrolide C ( <b>3</b> ) in $\text{CDCl}_3$ (500MHz) .....                                                                    | 17 |
| <b>Figure S23.</b> $^{13}\text{C}$ NMR spectrum of swetemicrolide C ( <b>3</b> ) in $\text{CDCl}_3$ (125MHz) .....                                                                 | 17 |
| <b>Figure S24.</b> HSQC spectrum of swetemicrolide C ( <b>3</b> ) in $\text{CDCl}_3$ .....                                                                                         | 18 |
| <b>Figure S25.</b> HMBC spectrum of swetemicrolide C ( <b>3</b> ) in $\text{CDCl}_3$ .....                                                                                         | 18 |

|                                                                                                                                                           |    |
|-----------------------------------------------------------------------------------------------------------------------------------------------------------|----|
| <b>Figure S26.</b> $^1\text{H} - ^1\text{H}$ COSY spectrum of swetemicrolide C ( <b>3</b> ) in $\text{CDCl}_3$ .....                                      | 19 |
| <b>Figure S27.</b> NOESY spectrum of swetemicrolide C ( <b>3</b> ) in $\text{CDCl}_3$ .....                                                               | 19 |
| <b>Figure S28.</b> UV spectrum of swetemicrolide D ( <b>4</b> ). .....                                                                                    | 20 |
| <b>Figure S29.</b> IR spectrum of swetemicrolide D ( <b>4</b> ). .....                                                                                    | 20 |
| <b>Figure S30.</b> HRESIMS spectrum of swetemicrolide D ( <b>4</b> ). .....                                                                               | 20 |
| <b>Figure S31.</b> $^1\text{H}$ NMR spectrum of swetemicrolide D ( <b>4</b> ) in $\text{CDCl}_3$ (500MHz) .....                                           | 21 |
| <b>Figure S32.</b> $^{13}\text{C}$ NMR spectrum of swetemicrolide D ( <b>4</b> ) in $\text{CDCl}_3$ (125MHz) .....                                        | 21 |
| <b>Figure S33.</b> HSQC spectrum of swetemicrolide D ( <b>4</b> ) in $\text{CDCl}_3$ .....                                                                | 22 |
| <b>Figure S34.</b> HMBC spectrum of swetemicrolide D ( <b>4</b> ) in $\text{CDCl}_3$ .....                                                                | 22 |
| <b>Figure S35.</b> $^1\text{H} - ^1\text{H}$ COSY spectrum of swetemicrolide D ( <b>4</b> ) in $\text{CDCl}_3$ .....                                      | 23 |
| <b>Figure S36.</b> NOESY spectrum of swetemicrolide D ( <b>4</b> ) in $\text{CDCl}_3$ .....                                                               | 23 |
| <b>Figure S37.</b> $^1\text{H}$ NMR spectrum of swiemahogin A ( <b>5</b> ) in acetone- $d_6$ (500MHz) .....                                               | 24 |
| <b>Figure S38.</b> $^{13}\text{C}$ NMR spectrum of swiemahogin A ( <b>5</b> ) in acetone- $d_6$ (125MHz) .....                                            | 24 |
| <b>Figure S39.</b> $^1\text{H}$ NMR spectrum of $\beta$ -sitosterol-3- $O$ - $\beta$ -D-glucopyranoside ( <b>6</b> ) in pyridine- $d_5$ (500MHz) .....    | 25 |
| <b>Figure S40.</b> $^{13}\text{C}$ NMR spectrum of $\beta$ -sitosterol-3- $O$ - $\beta$ -D-glucopyranoside ( <b>6</b> ) in pyridine- $d_5$ (125MHz) ..... | 25 |
| <b>Figure S41.</b> $^1\text{H}$ NMR spectrum of homovanillyl alcohol ( <b>7</b> ) in acetone- $d_6$ (500MHz) ....                                         | 26 |
| <b>Figure S42.</b> $^{13}\text{C}$ NMR spectrum of homovanillyl alcohol ( <b>7</b> ) in acetone- $d_6$ (125MHz) ...                                       | 26 |

**Table S1. <sup>1</sup>H (500 MHz) and <sup>13</sup>C (125 MHz) NMR data for swimahogin A (5) in acetone-*d*<sub>6</sub>**

| No.                | $\delta_{\text{H}}$ ( <i>J</i> in Hz)                                        | $\delta_{\text{C}}$ |
|--------------------|------------------------------------------------------------------------------|---------------------|
| 1                  | 7.06 d (10.5)                                                                | 154.9               |
| 2                  | 5.86 d (10.5)                                                                | 125.8               |
| 3                  | -                                                                            | 203.0               |
| 4                  | -                                                                            | 46.9                |
| 5                  | 2.64 dd (6.1, 3.1)                                                           | 45.6                |
| 6                  | H <sub>a</sub> : 2.58 dd (17.0, 6.2)<br>H <sub>b</sub> : 2.42 dd (17.0, 3.1) | 33.1                |
| 7                  | -                                                                            | 175.6               |
| 8                  | -                                                                            | 93.5                |
| 9                  | 1.81 m                                                                       | 52.5                |
| 10                 | -                                                                            | 45.0                |
| 11                 | 1.56 m                                                                       | 22.3                |
| 12                 | 1.51 m; 1.30 m                                                               | 34.5                |
| 13                 | -                                                                            | 43.0                |
| 14                 | -                                                                            | 87.3                |
| 15                 | 2.95 d (16.8); 2.30 d (16.8)                                                 | 43.2                |
| 16                 | -                                                                            | 174.5               |
| 17                 | 5.47 m                                                                       | 71.4                |
| 18                 | 1.08 s                                                                       | 17.8                |
| 19                 | 1.41 s                                                                       | 20.2                |
| 20                 | -                                                                            | 126.6               |
| 21                 | 7.57 brs                                                                     | 142.0               |
| 22                 | 6.49 brs                                                                     | 111.3               |
| 23                 | 7.51 t (1.4)                                                                 | 143.8               |
| 28                 | 1.00 s                                                                       | 24.0                |
| 29                 | 1.11 s                                                                       | 23.3                |
| 30                 | 1.90 s                                                                       | 16.7                |
| 7-OCH <sub>3</sub> | 3.67 s                                                                       | 52.8                |
| 14-OH              | 6.77 dd (5.2, 2.3)                                                           |                     |
| 17-OH              | 5.65 t (3.2)                                                                 |                     |



**Table S2.  $^1\text{H}$  (500 MHz) and  $^{13}\text{C}$  (125 MHz) NMR data for  $\beta$ -sitosterol-3-*O*- $\beta$ -D-glucopyranoside (6) in pyridine- $d_5$**

| No. | $\delta_{\text{H}}$ ( <i>J</i> in Hz) | $\delta_{\text{C}}$ |
|-----|---------------------------------------|---------------------|
| 1   |                                       | 38.0                |
| 2   |                                       | 30.8                |
| 3   | 4.00 m                                | 78.7                |
| 4   |                                       | 39.9                |
| 5   |                                       | 141.5               |
| 6   | 5.38 m                                | 122.4               |
| 7   |                                       | 32.7                |
| 8   |                                       | 32.6                |
| 9   |                                       | 50.9                |
| 10  |                                       | 37.5                |
| 11  |                                       | 21.8                |
| 12  |                                       | 40.5                |
| 13  |                                       | 43.0                |
| 14  |                                       | 57.4                |
| 15  |                                       | 25.0                |
| 16  |                                       | 29.1                |
| 17  |                                       | 56.8                |
| 18  | 0.69 s                                | 12.5                |
| 19  | 0.96 s                                | 19.8                |
| 20  |                                       | 36.9                |
| 21  | 1.01 d (6.5)                          | 19.6                |
| 22  |                                       | 34.8                |
| 23  |                                       | 27.0                |
| 24  |                                       | 46.6                |
| 25  |                                       | 30.0                |
| 26  | 0.93 d (7.4)                          | 19.9                |
| 27  | 0.89 d (6.9)                          | 20.5                |

|    |                                                                              |       |
|----|------------------------------------------------------------------------------|-------|
| 28 |                                                                              | 24.0  |
| 29 | 0.91 t (6.9)                                                                 | 12.7  |
| 1' | 5.08 d (7.8)                                                                 | 103.1 |
| 2' | 4.08 t (8.2)                                                                 | 75.9  |
| 3' | 4.31 m                                                                       | 79.1  |
| 4' | 4.31 m                                                                       | 72.3  |
| 5' | 4.00 m                                                                       | 79.0  |
| 6' | H <sub>a</sub> : 4.59 dd (11.8, 2.5)<br>H <sub>b</sub> : 4.44 dd (11.8, 5.3) | 63.4  |

---

**Table S3.  $^1\text{H}$  (500 MHz) and  $^{13}\text{C}$  (125 MHz) NMR data for homovanillyl alcohol (7) in acetone- $d_6$**

| No.                | $\delta_{\text{H}}$ ( $J$ in Hz) | $\delta_{\text{C}}$ |
|--------------------|----------------------------------|---------------------|
| 1                  |                                  | 145.8               |
| 2                  |                                  | 148.3               |
| 3                  | 6.83 d (1.4)                     | 113.5               |
| 4                  |                                  | 131.8               |
| 5                  | 6.62 dd (8.0 và 1.5)             | 122.3               |
| 6                  | 6.72 d (8.0)                     | 115.6               |
| 1'                 | 2.71 t (7.1)                     | 40.0                |
| 2'                 | 3.69 m                           | 64.3                |
| 2-OCH <sub>3</sub> | 3.82 s                           | 56.3                |
| 1-OH               | 7.29 s                           |                     |
| 2'-OH              | 3.58 t (5.5)                     |                     |

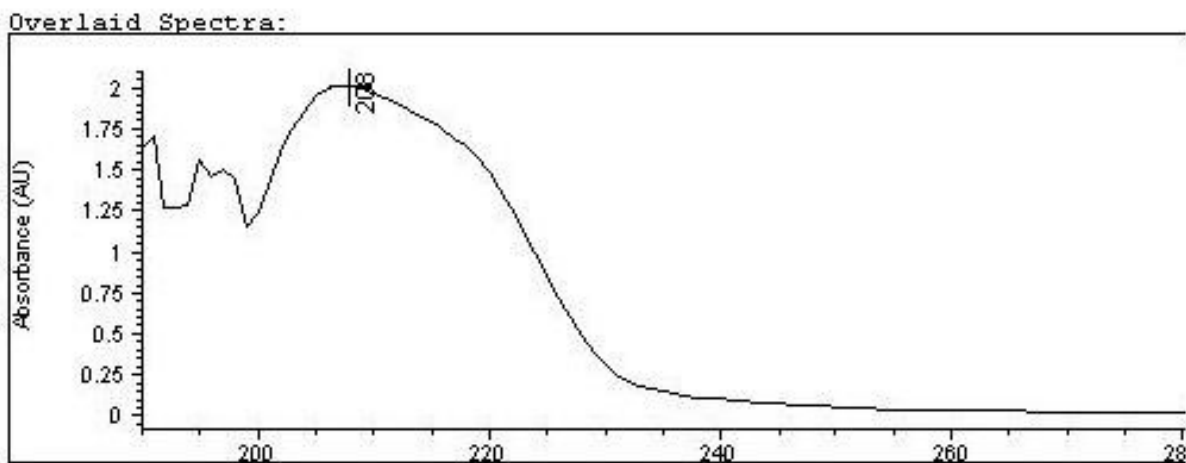

Figure S1. UV spectrum of swetemicrolide A (1)

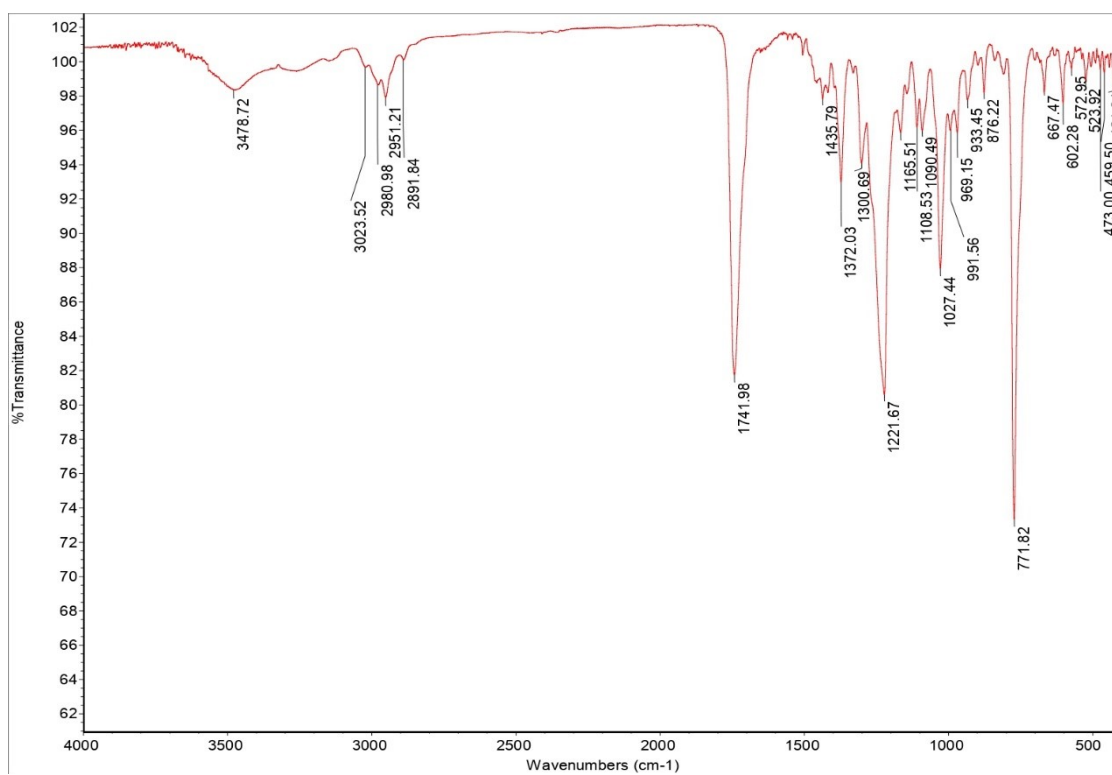

Figure S2. IR spectrum of swetemicrolide A (1)

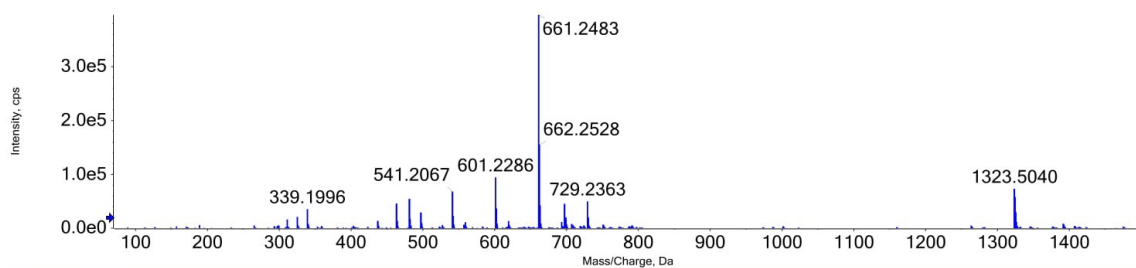

Figure S3. HRESIMS spectrum of swetemicrolide A (1)

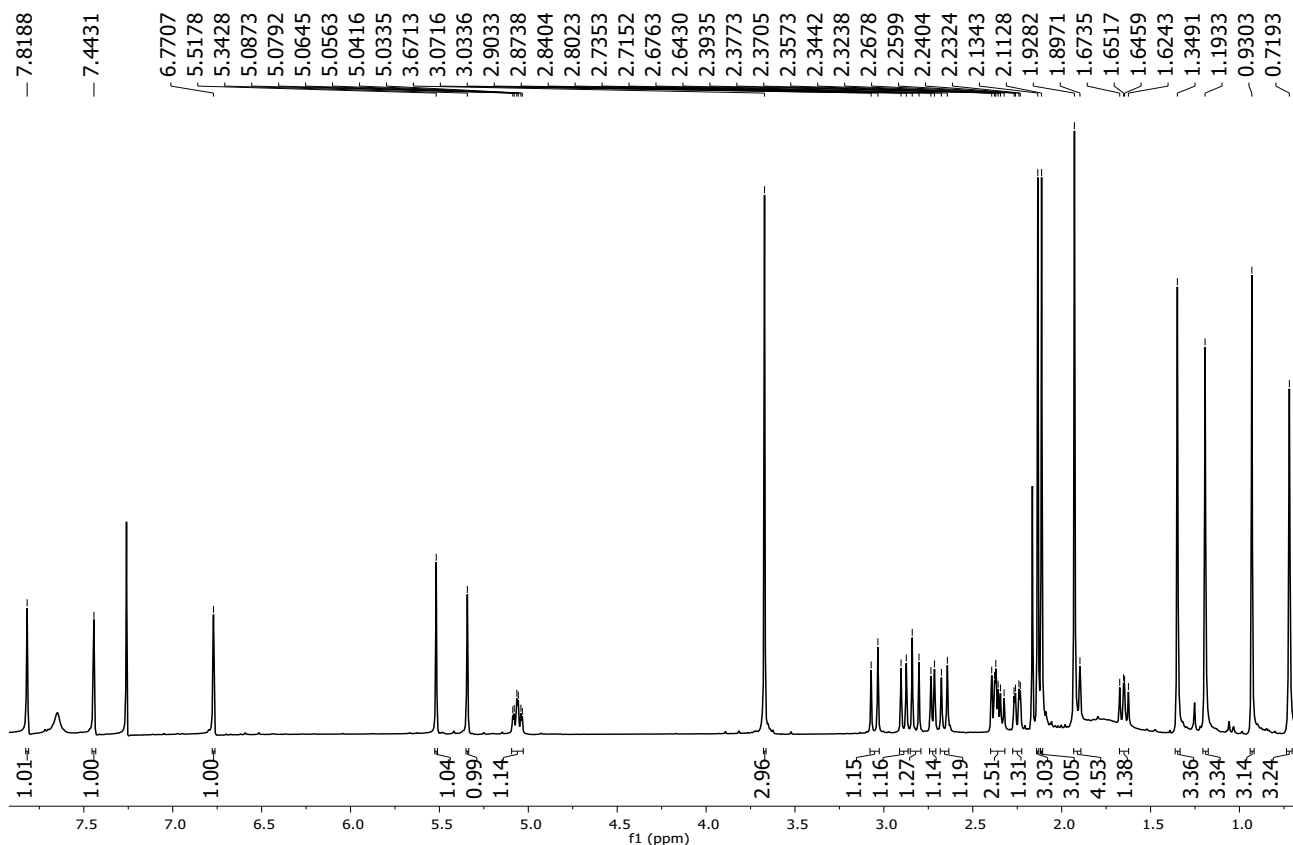

Figure S4.  $^1\text{H}$  NMR spectrum of swetemicrolide A (**1**) in  $\text{CDCl}_3$  (500MHz)

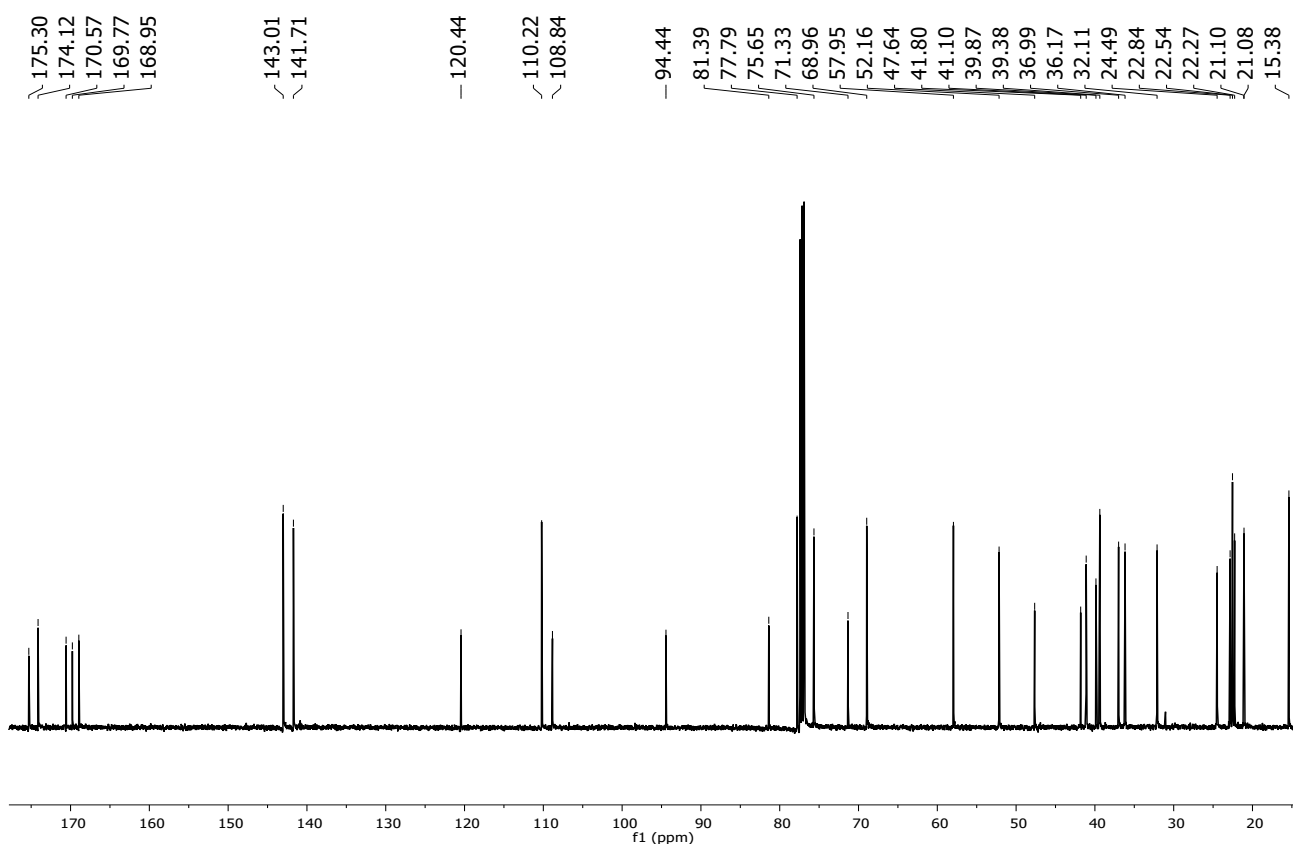

Figure S5.  $^{13}\text{C}$  NMR spectrum of swetemicrolide A (**1**) in  $\text{CDCl}_3$  (125MHz)

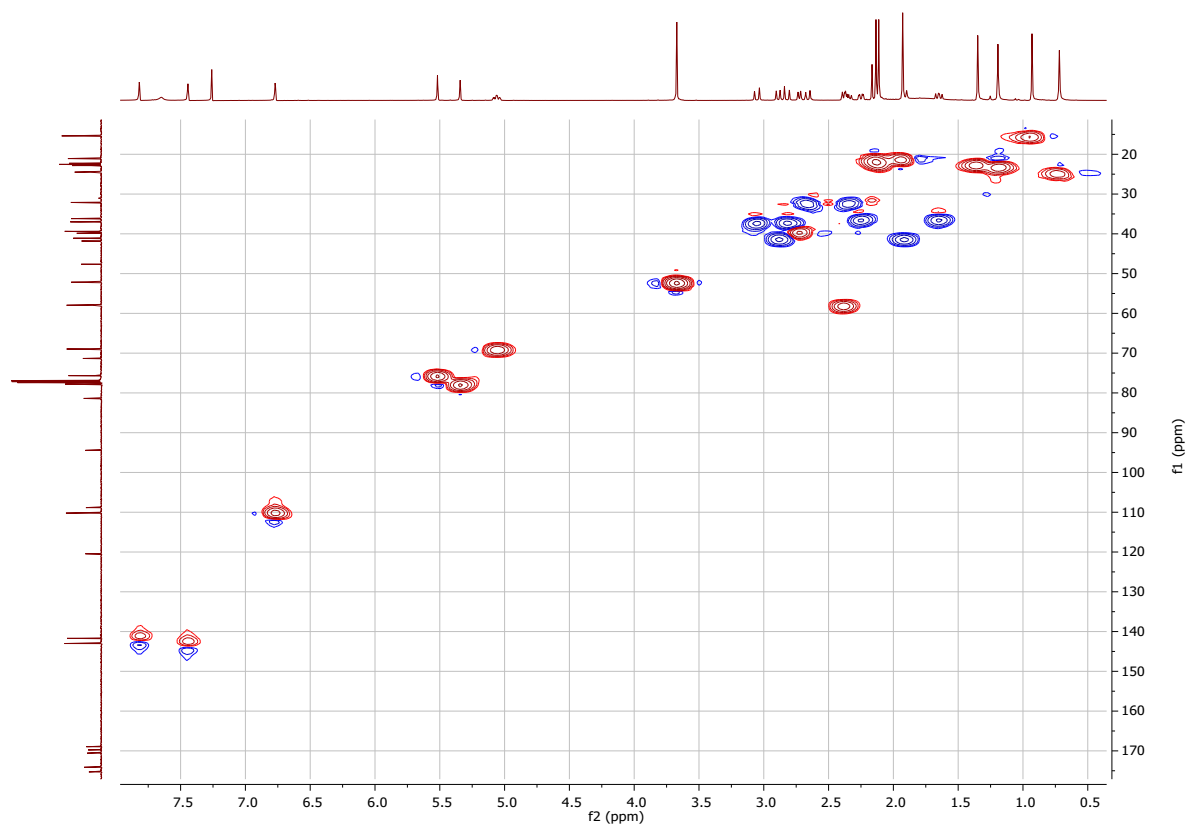

**Figure S6.** HMBC spectrum of swetemicrolide A (**1**) in  $\text{CDCl}_3$

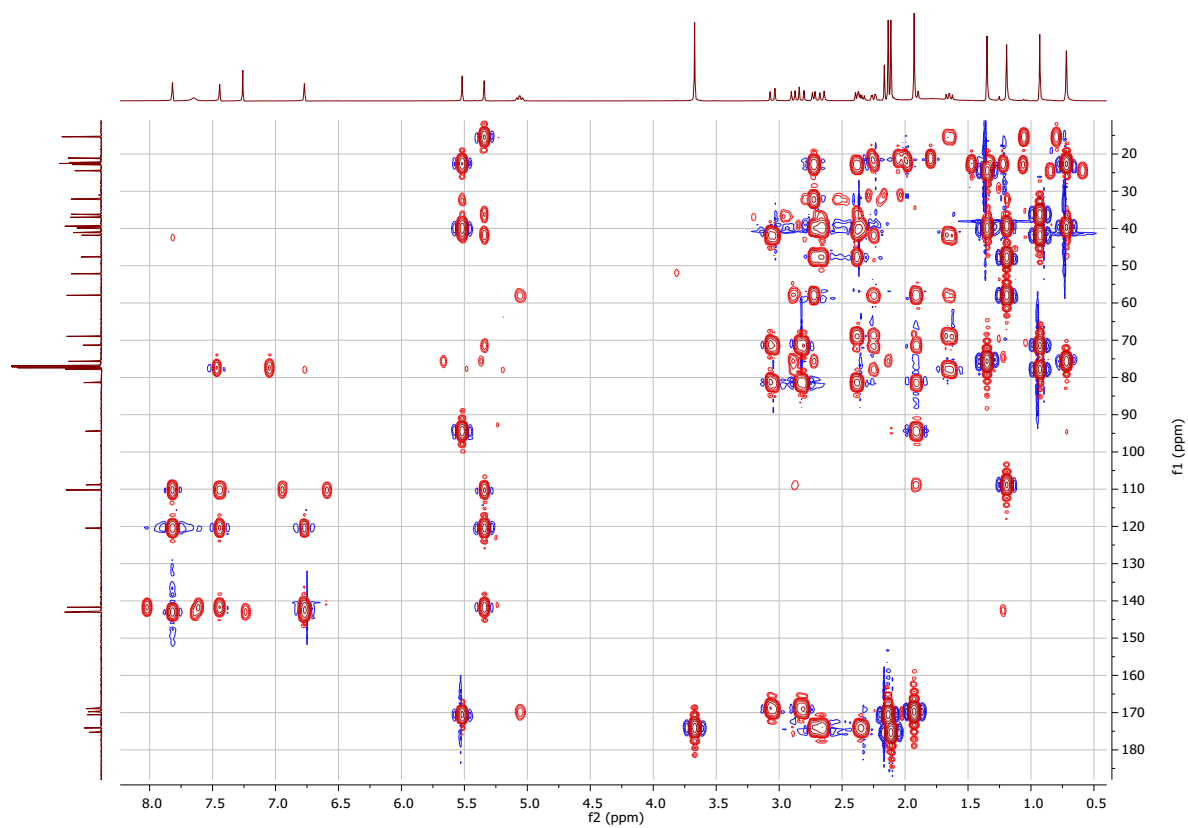

**Figure S7.** HMBC spectrum of swetemicrolide A (**1**) in  $\text{CDCl}_3$

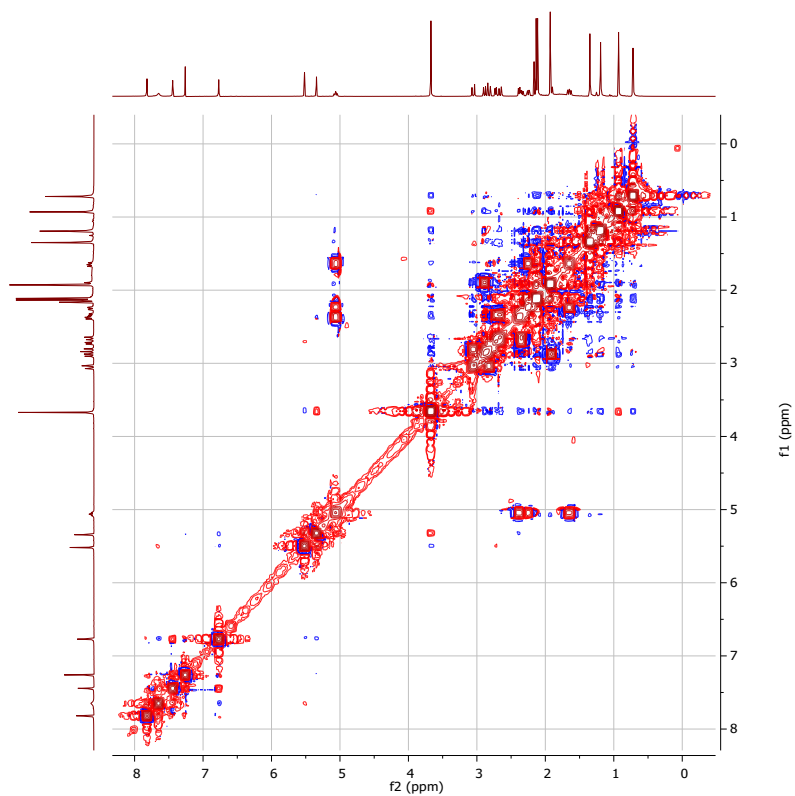

**Figure S8.**  $^1\text{H} - ^1\text{H}$  COSY spectrum of swetemicrolide A (**1**) in  $\text{CDCl}_3$

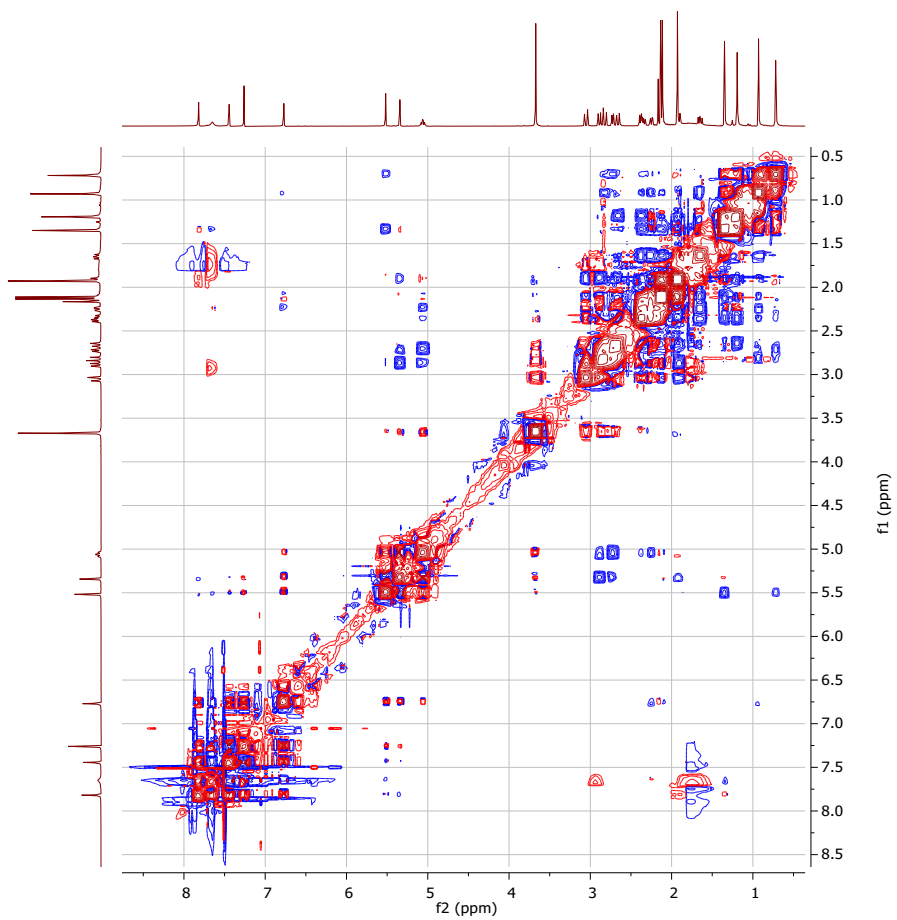

**Figure S9.** NOESY spectrum of swetemicrolide A (**1**) in  $\text{CDCl}_3$

Overlaid Spectra:

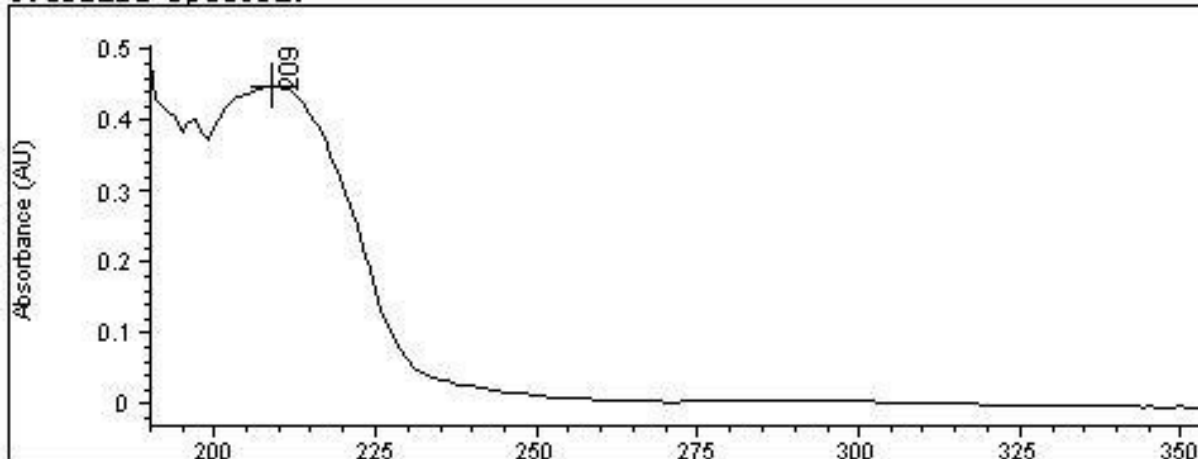

Figure S10. UV spectrum of swetemicrolide B (2).

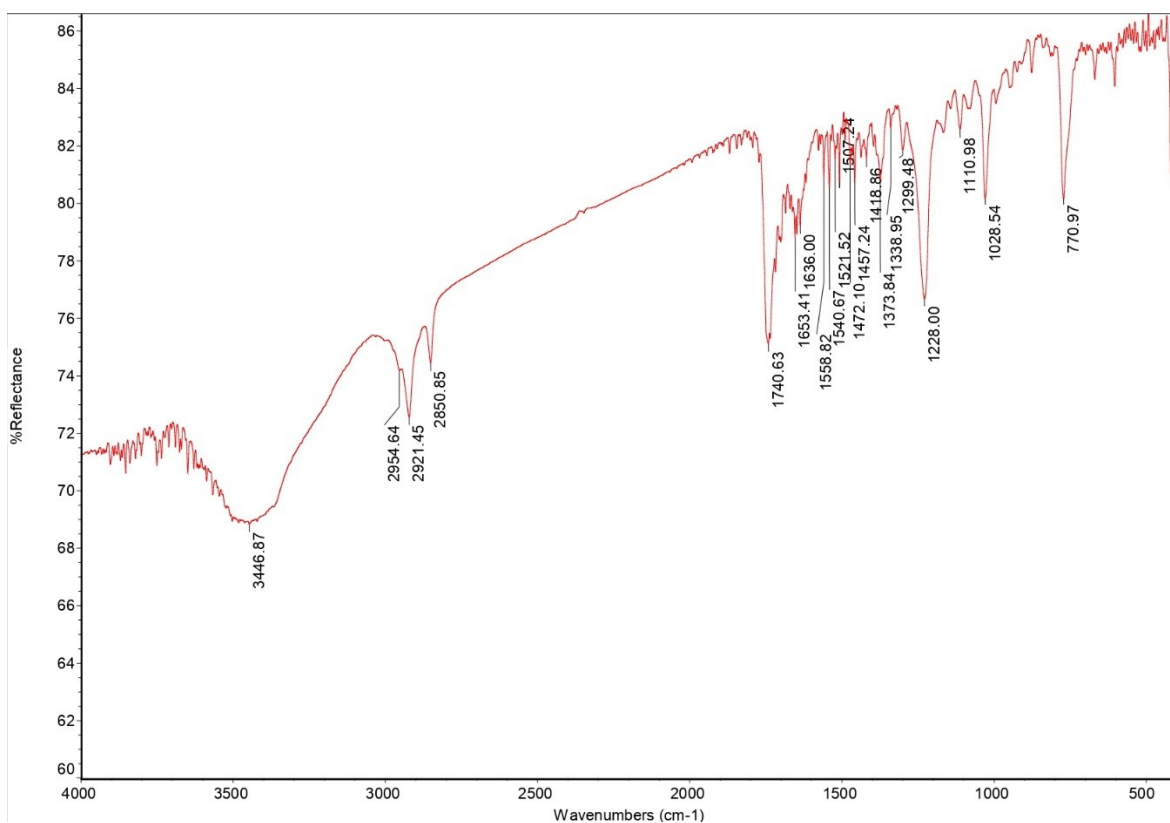

Figure S11. IR spectrum of swetemicrolide B (2).

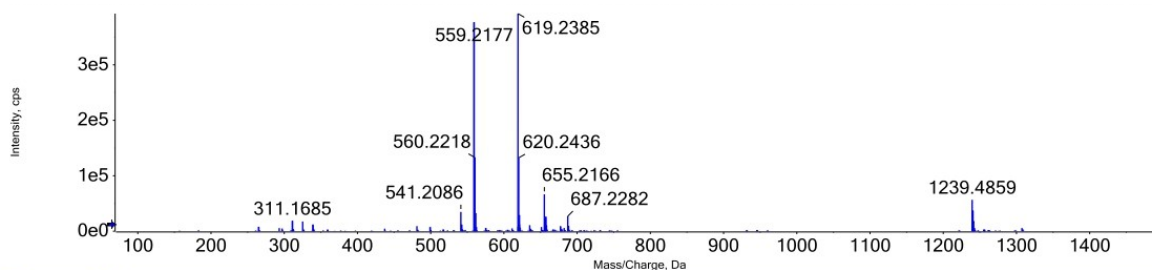

Figure S12. HRESIMS spectrum of swetemicrolide B (2).



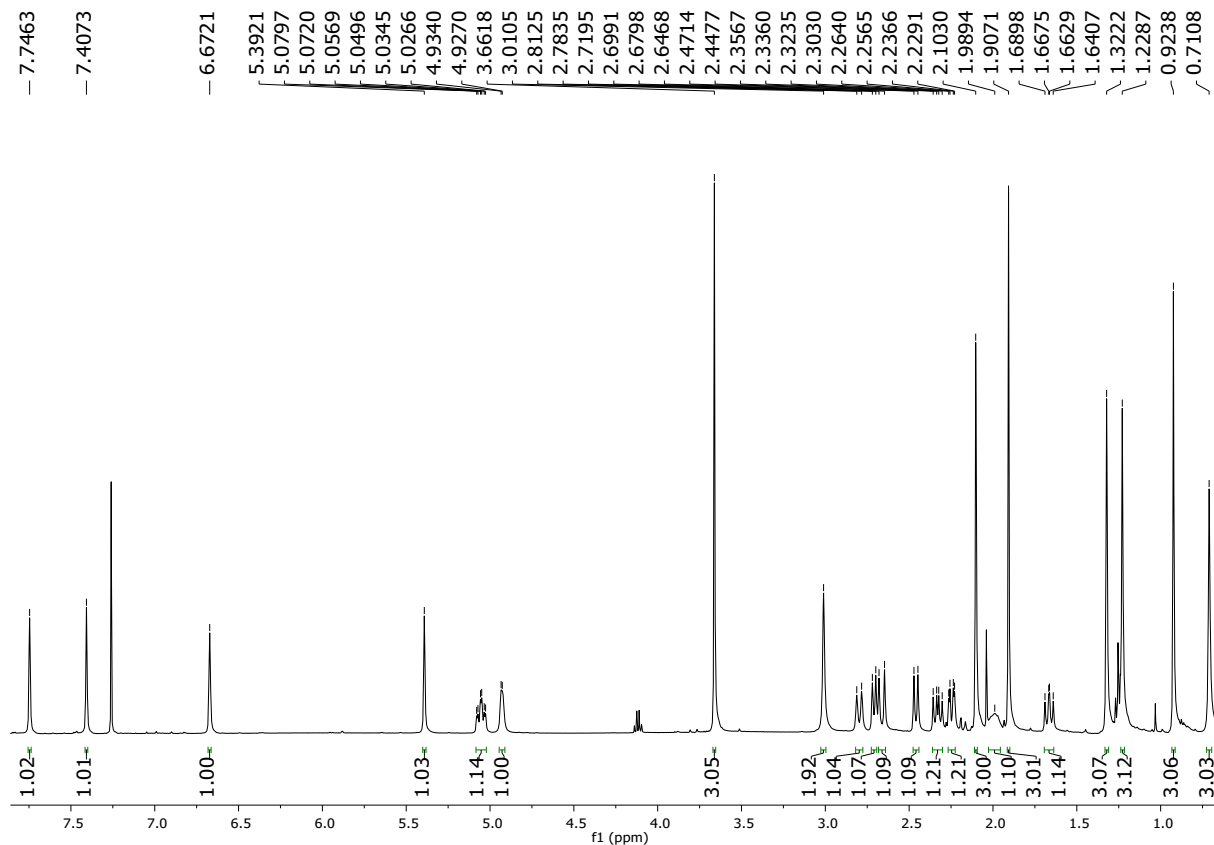

Figure S13.  $^1\text{H}$  NMR spectrum of swetemicrolide B (**2**) in  $\text{CDCl}_3$  (500MHz)

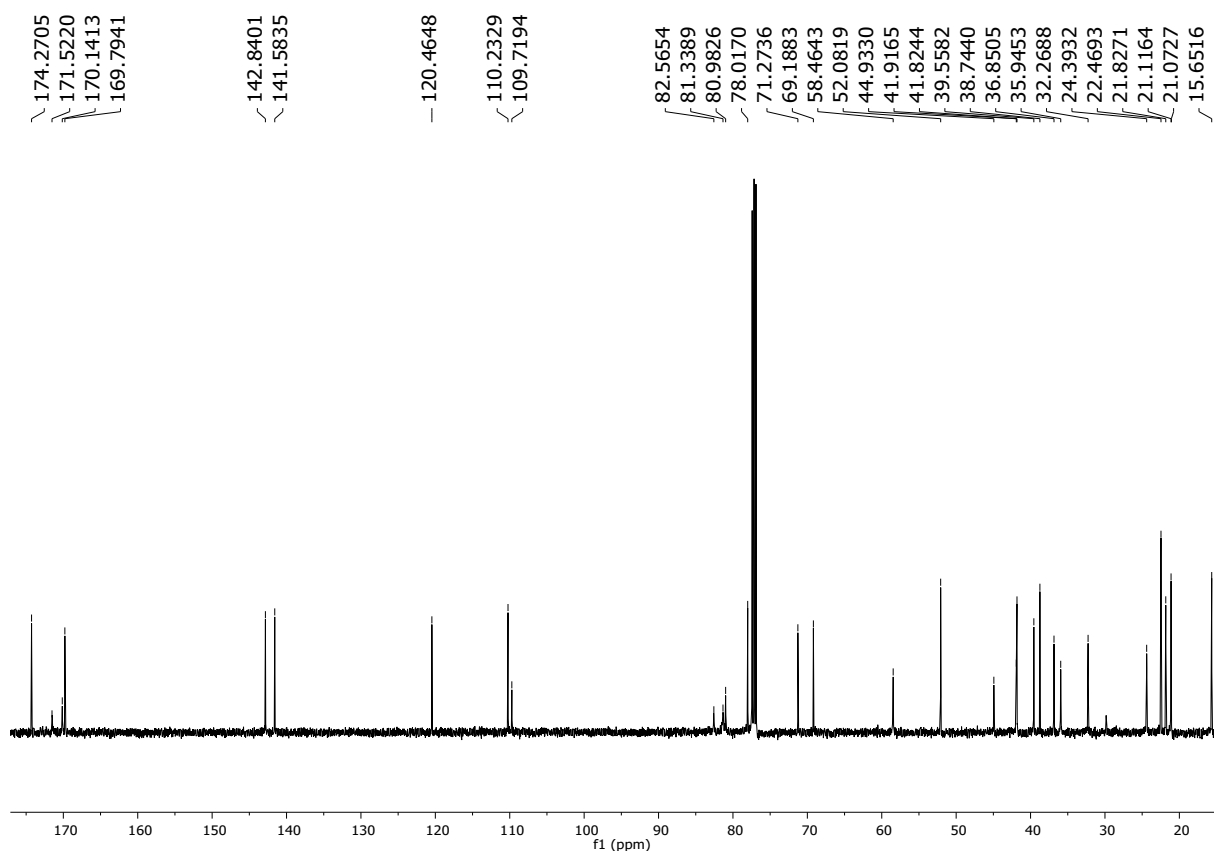

Figure S14.  $^{13}\text{C}$  NMR spectrum of swetemicrolide B (**2**) in  $\text{CDCl}_3$  (125MHz)

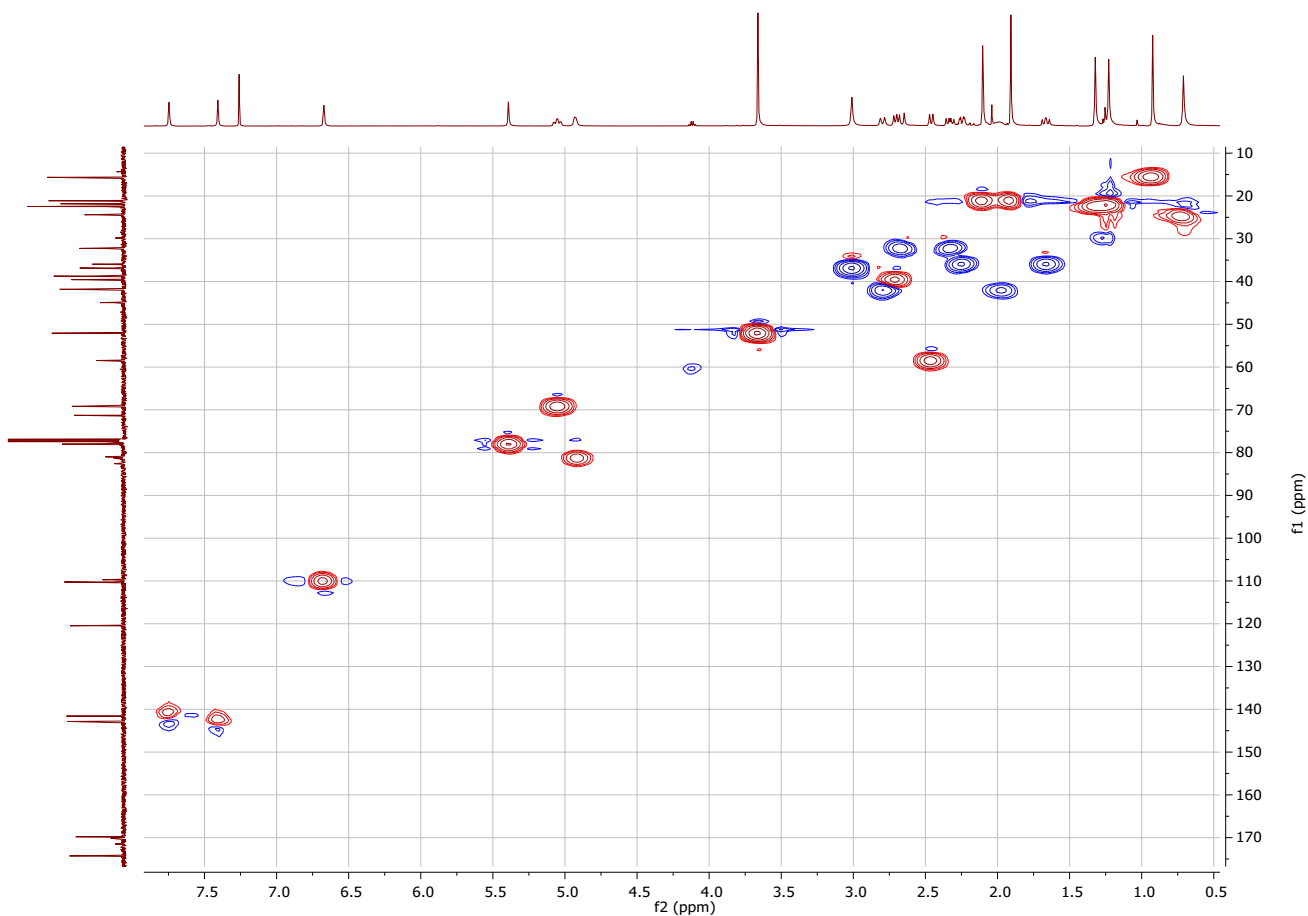

Figure S15. HSQC spectrum of swetemicrolide B (**2**) in  $\text{CDCl}_3$

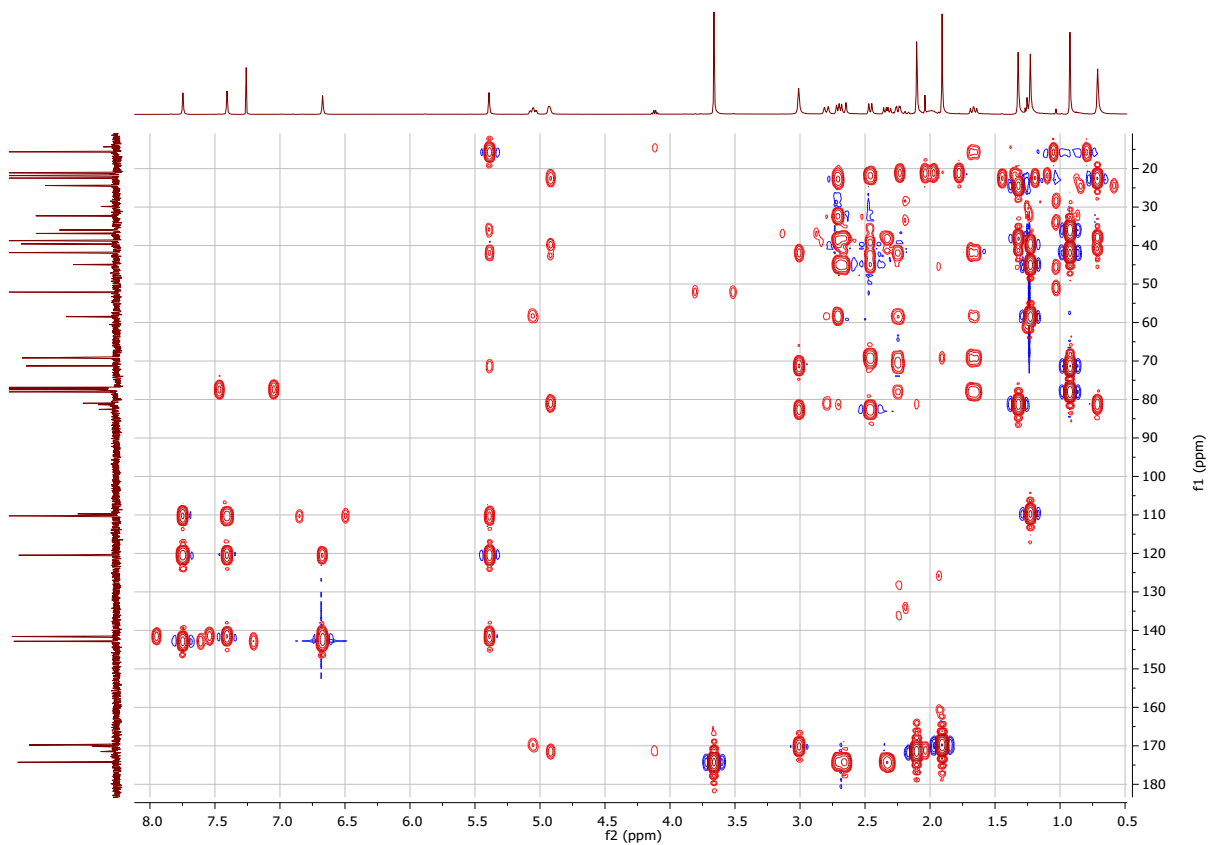

Figure S16. HMBC spectrum of swetemicrolide B (**2**) in  $\text{CDCl}_3$

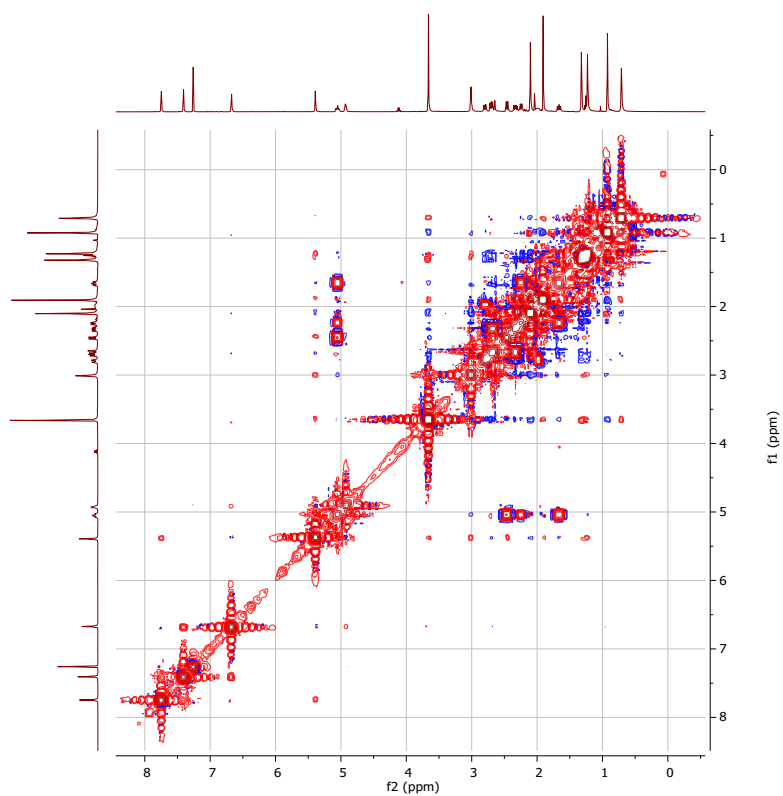

**Figure S17.**  $^1\text{H} - ^1\text{H}$  COSY spectrum of swetemicrolide B (**2**) in  $\text{CDCl}_3$

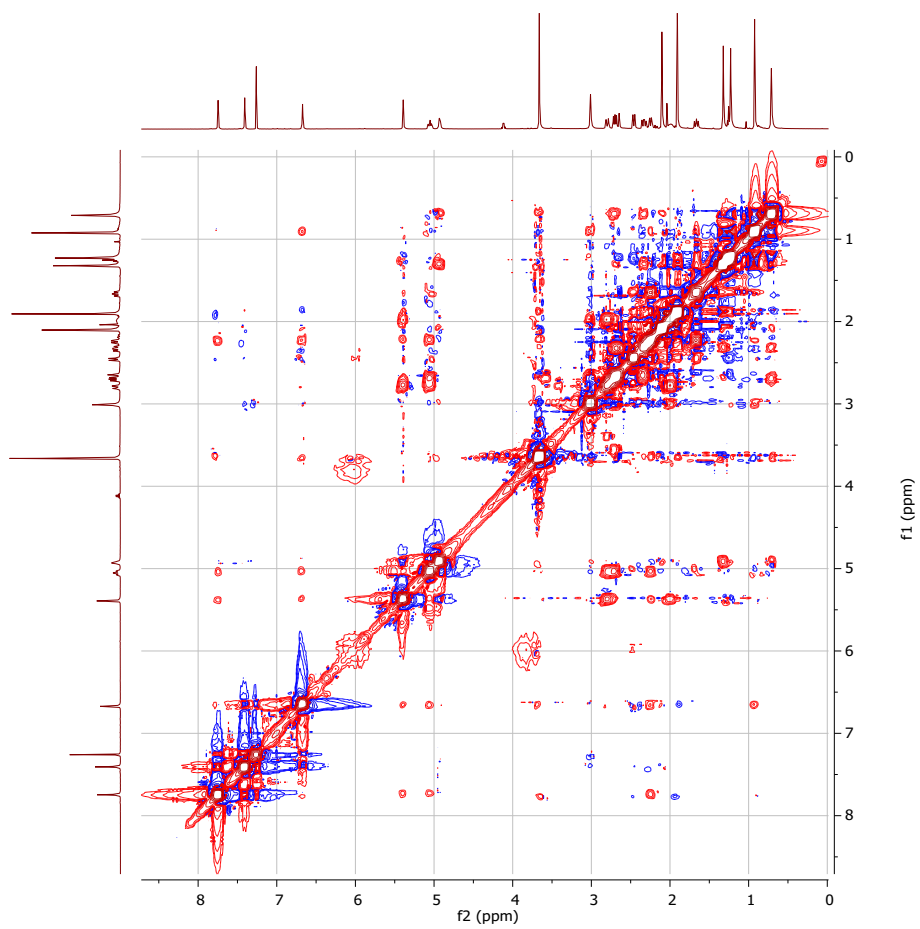

**Figure S18.** NOESY spectrum of swetemicrolide B (**2**) in  $\text{CDCl}_3$

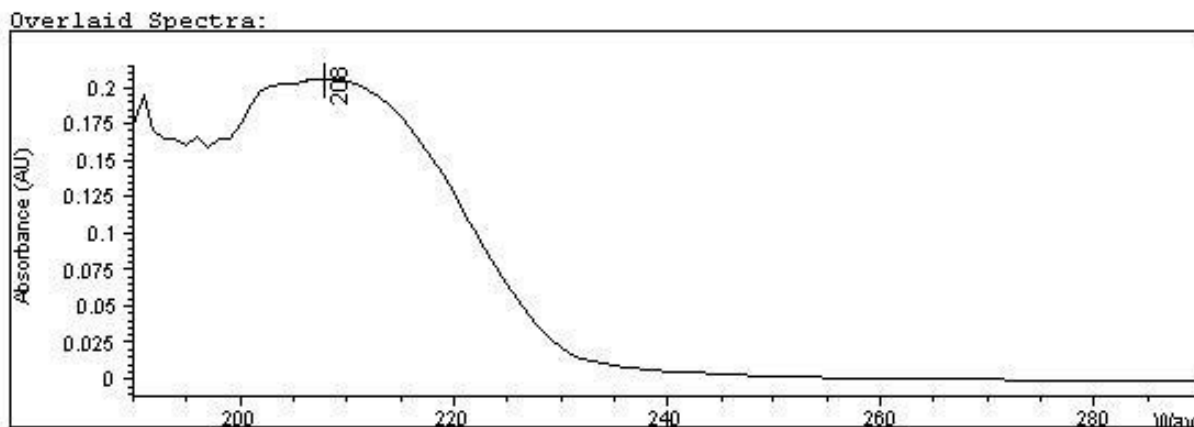

Figure S19. UV spectrum of swetemicrolide C (3).

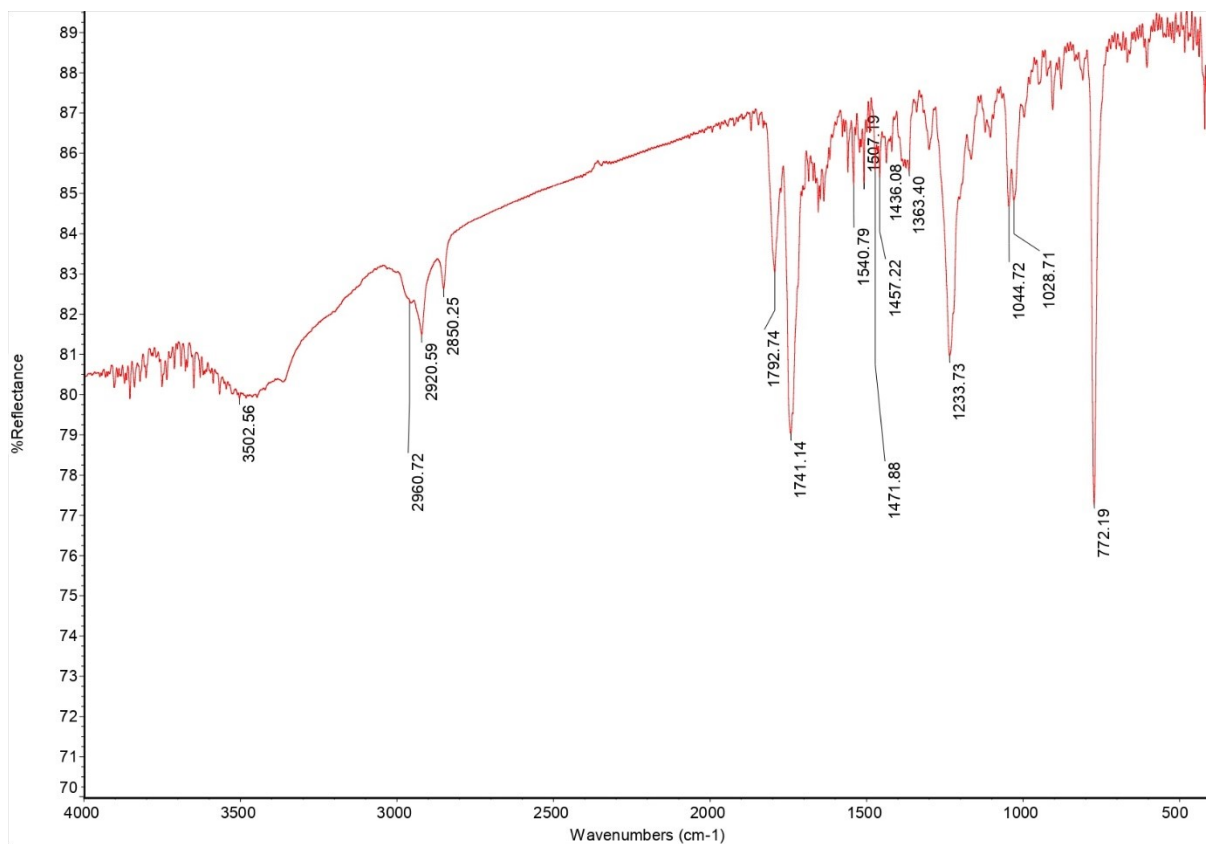

Figure S20. IR spectrum of swetemicrolide C (3).

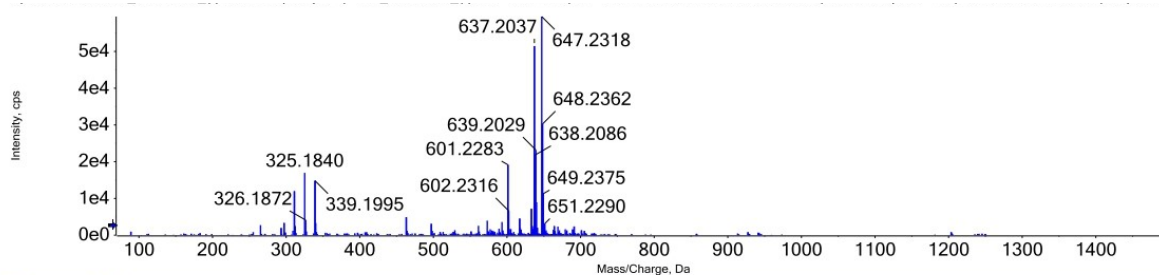

Figure S21. HRESIMS spectrum of swetemicrolide C (3).

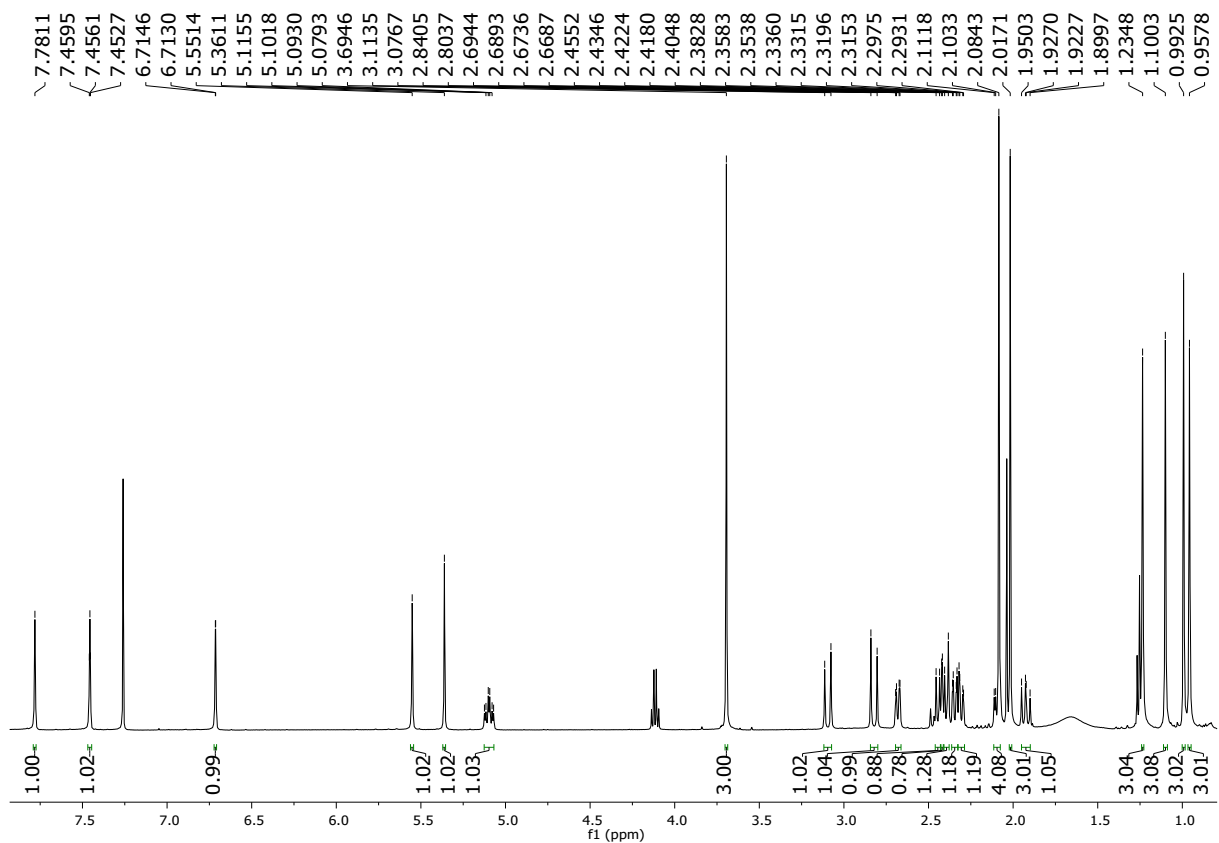

Figure S22.  $^1\text{H}$  NMR spectrum of swetemicrolide C (**3**) in  $\text{CDCl}_3$  (500MHz)

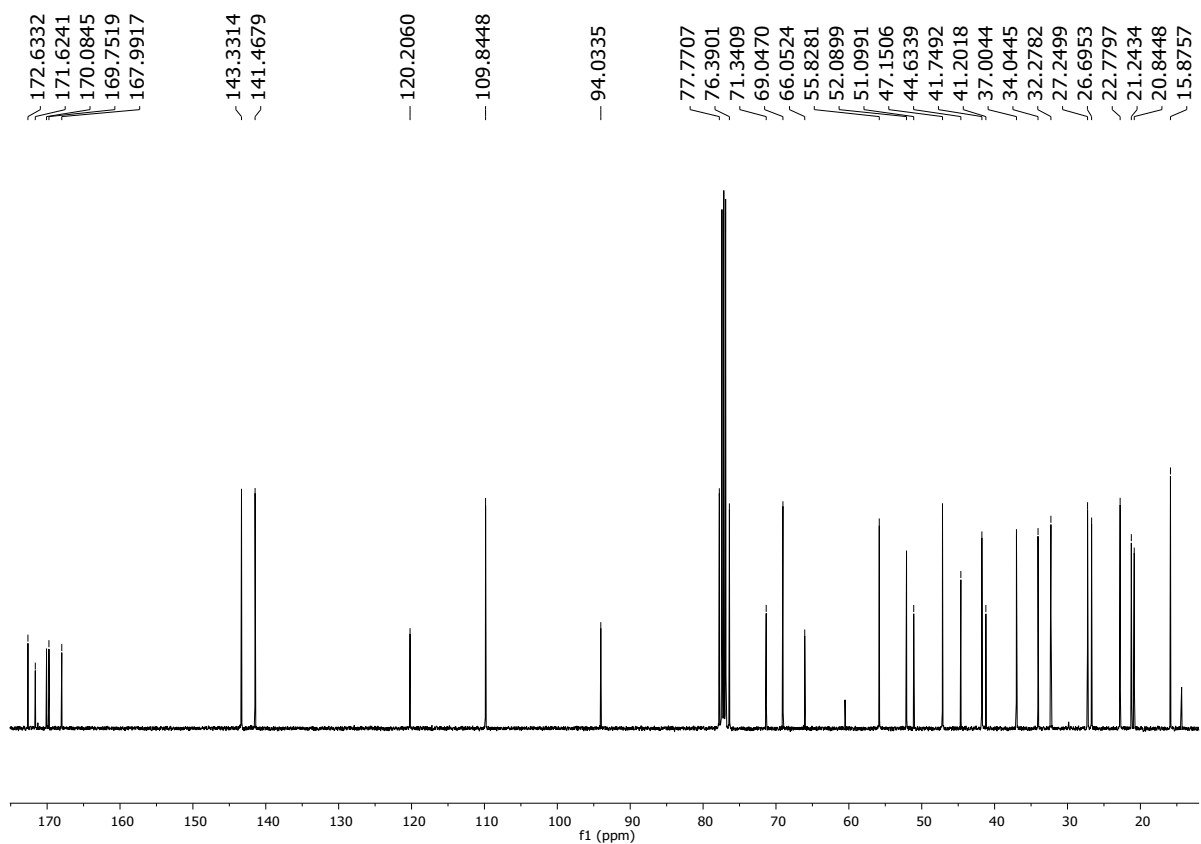

Figure S23.  $^{13}\text{C}$  NMR spectrum of swetemicrolide C (**3**) in  $\text{CDCl}_3$  (125MHz)

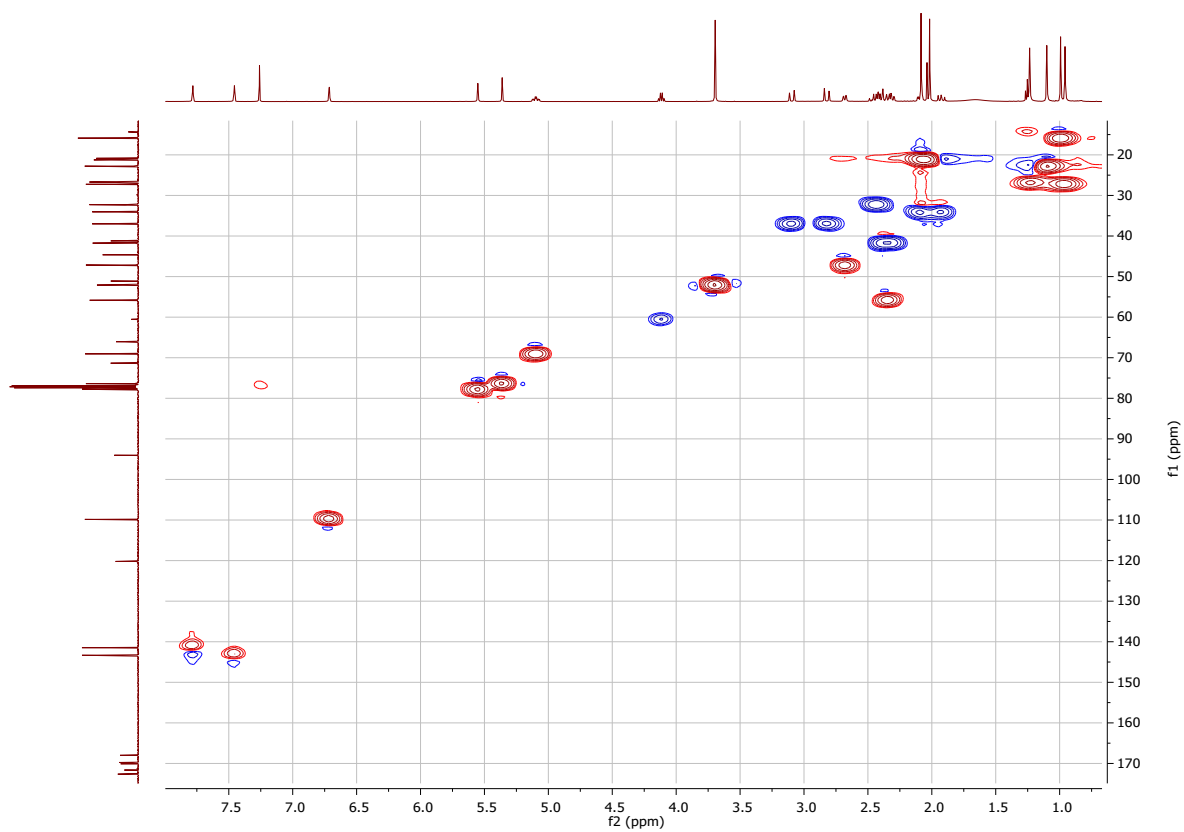

**Figure S24.** HSQC spectrum of swetemicrolide C (**3**) in  $\text{CDCl}_3$

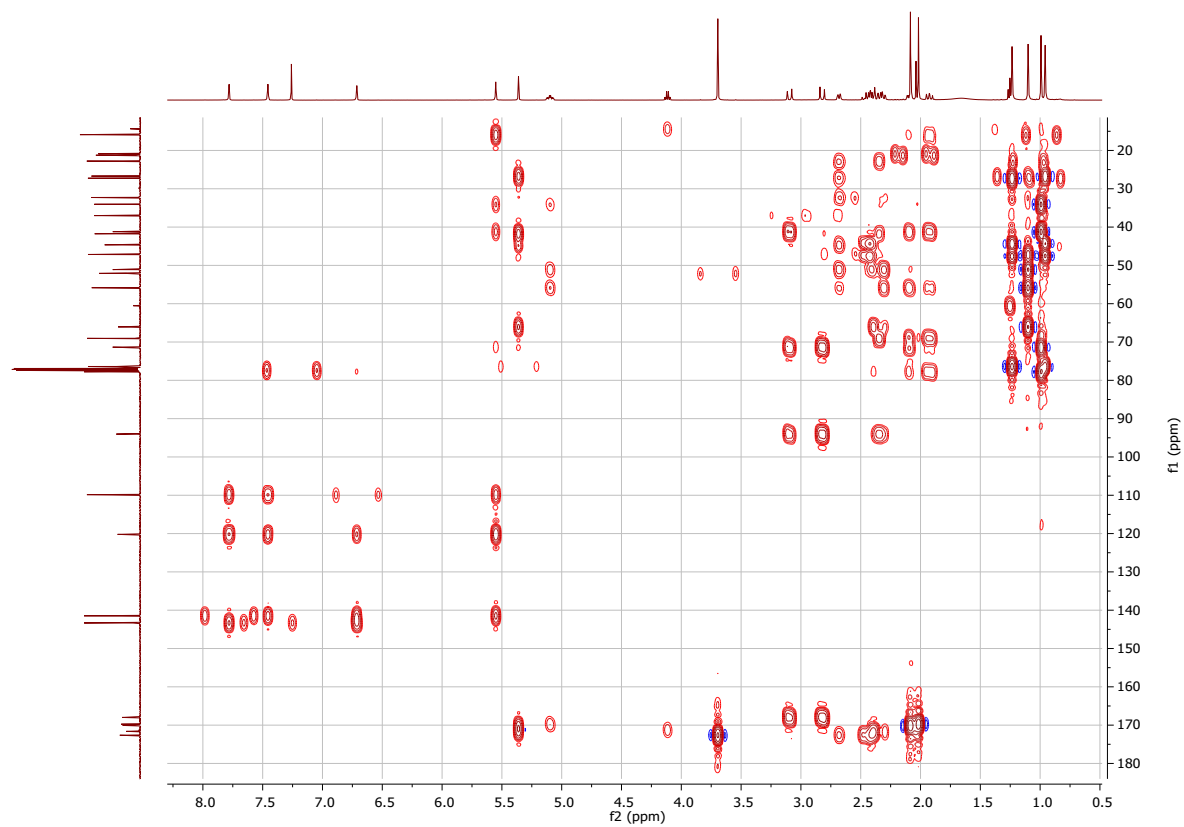

**Figure S25.** HMBC spectrum of swetemicrolide C (**3**) in  $\text{CDCl}_3$

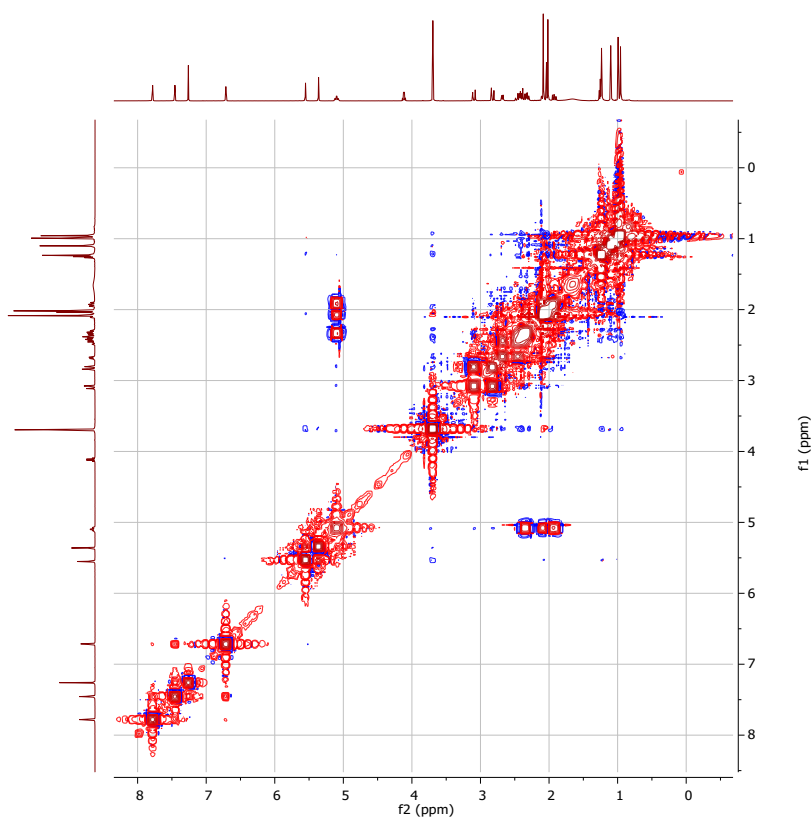

**Figure S26.**  $^1\text{H} - ^1\text{H}$  COSY spectrum of swetemicrolide C (**3**) in  $\text{CDCl}_3$

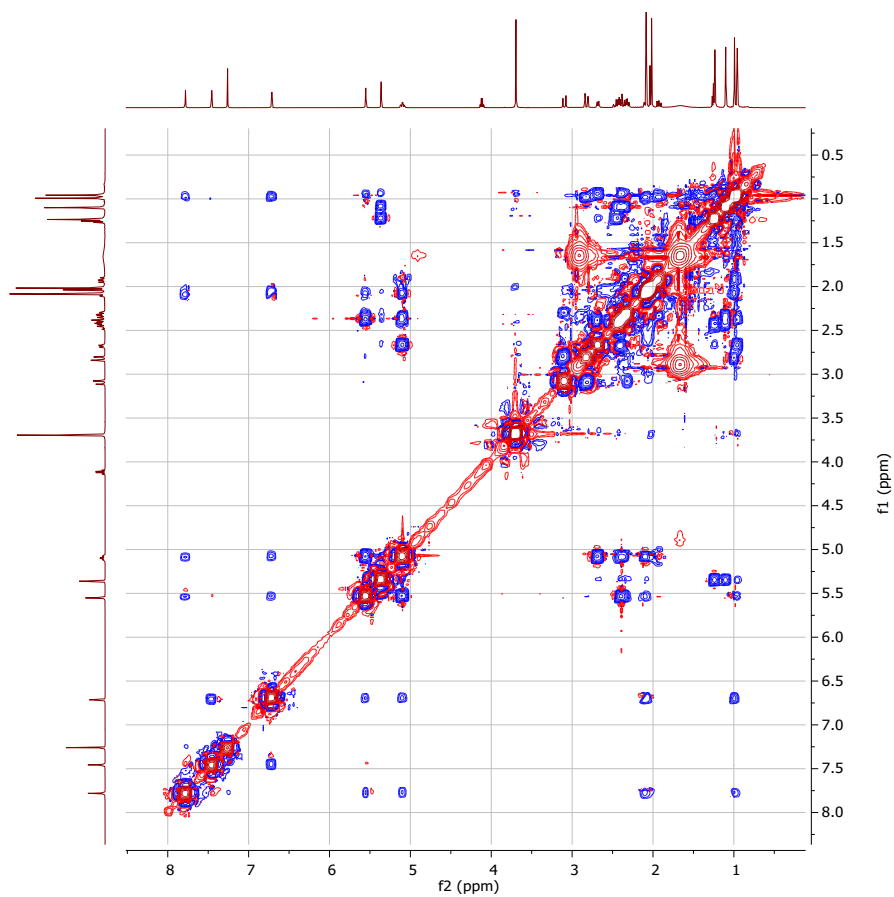

**Figure S27.** NOESY spectrum of swetemicrolide C (**3**) in  $\text{CDCl}_3$

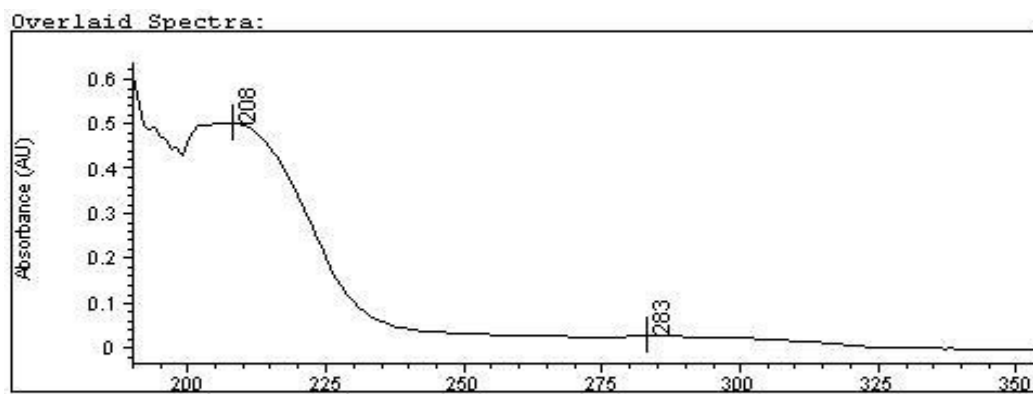

Figure S28. UV spectrum of swetemicrolide D (4).

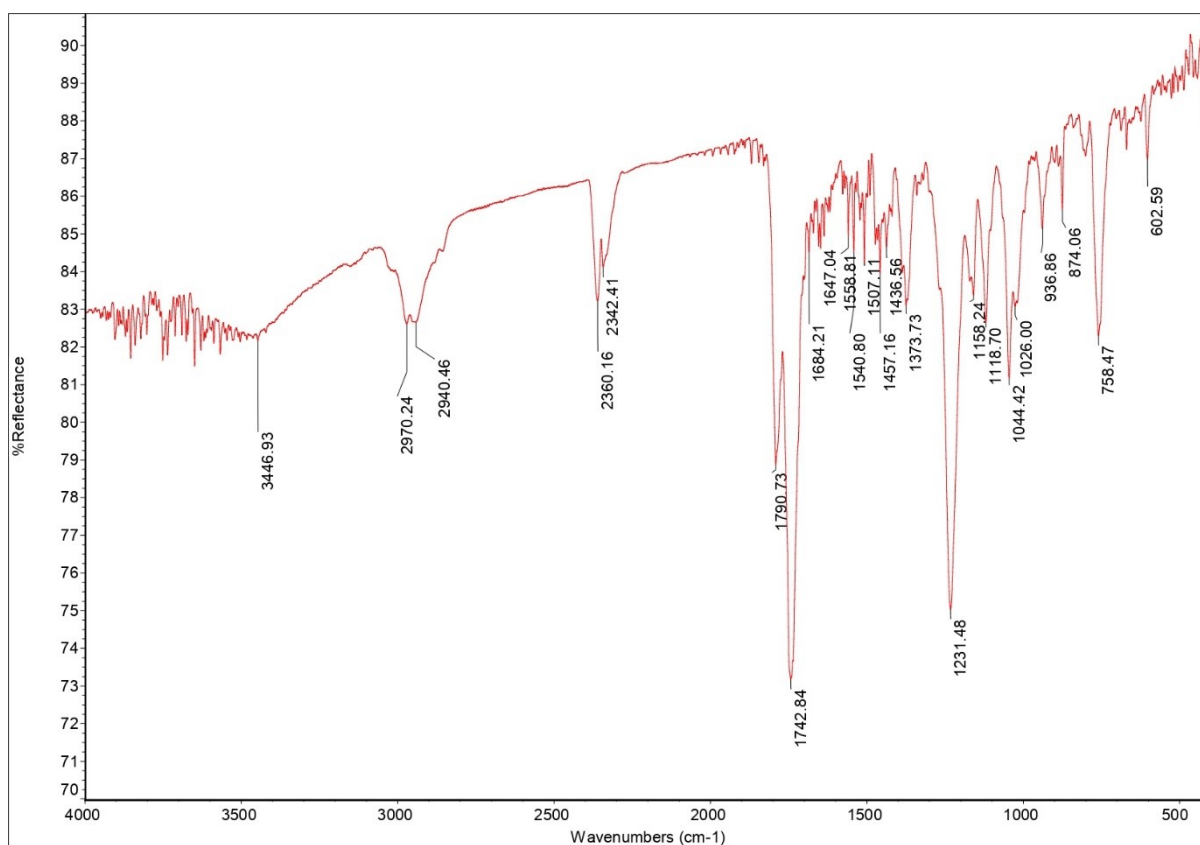

Figure S29. IR spectrum of swetemicrolide D (4).



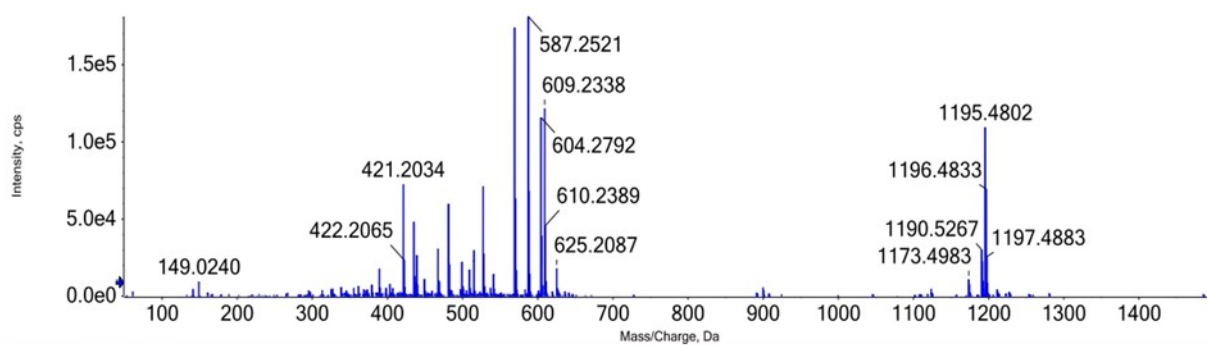

**Figure S30.** HRESIMS spectrum of swetemicrolide D (**4**).

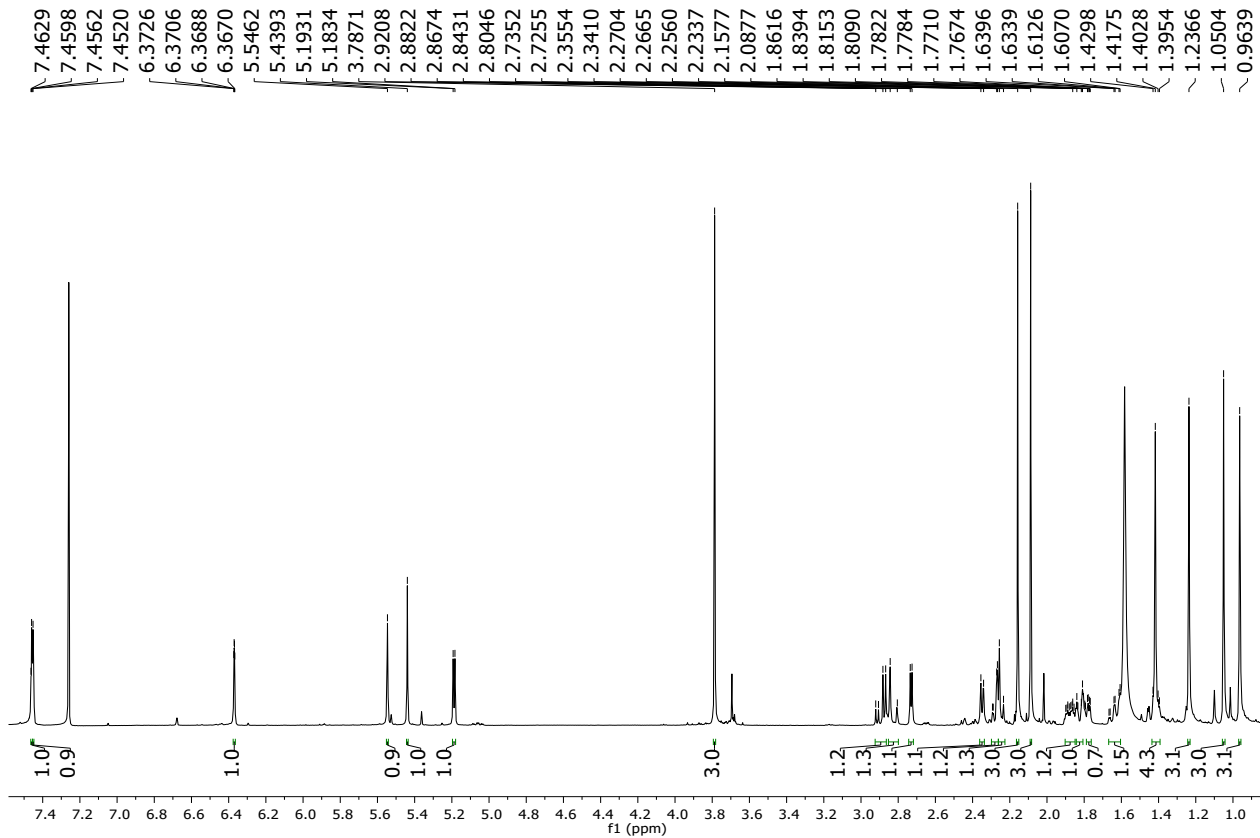

Figure S31.  $^1\text{H}$  NMR spectrum of swetemicrolide D (4) in  $\text{CDCl}_3$  (500MHz)

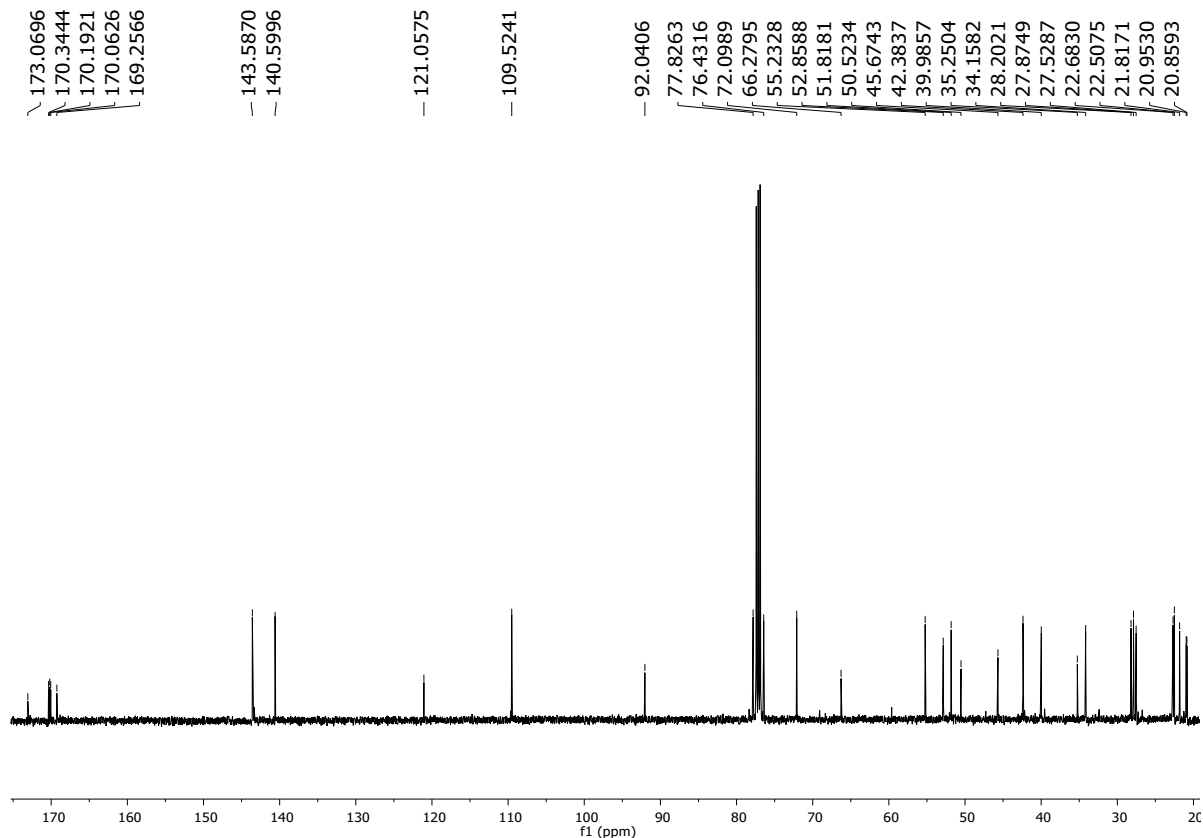

Figure S32.  $^{13}\text{C}$  NMR spectrum of swetemicrolide D (4) in  $\text{CDCl}_3$  (125MHz)

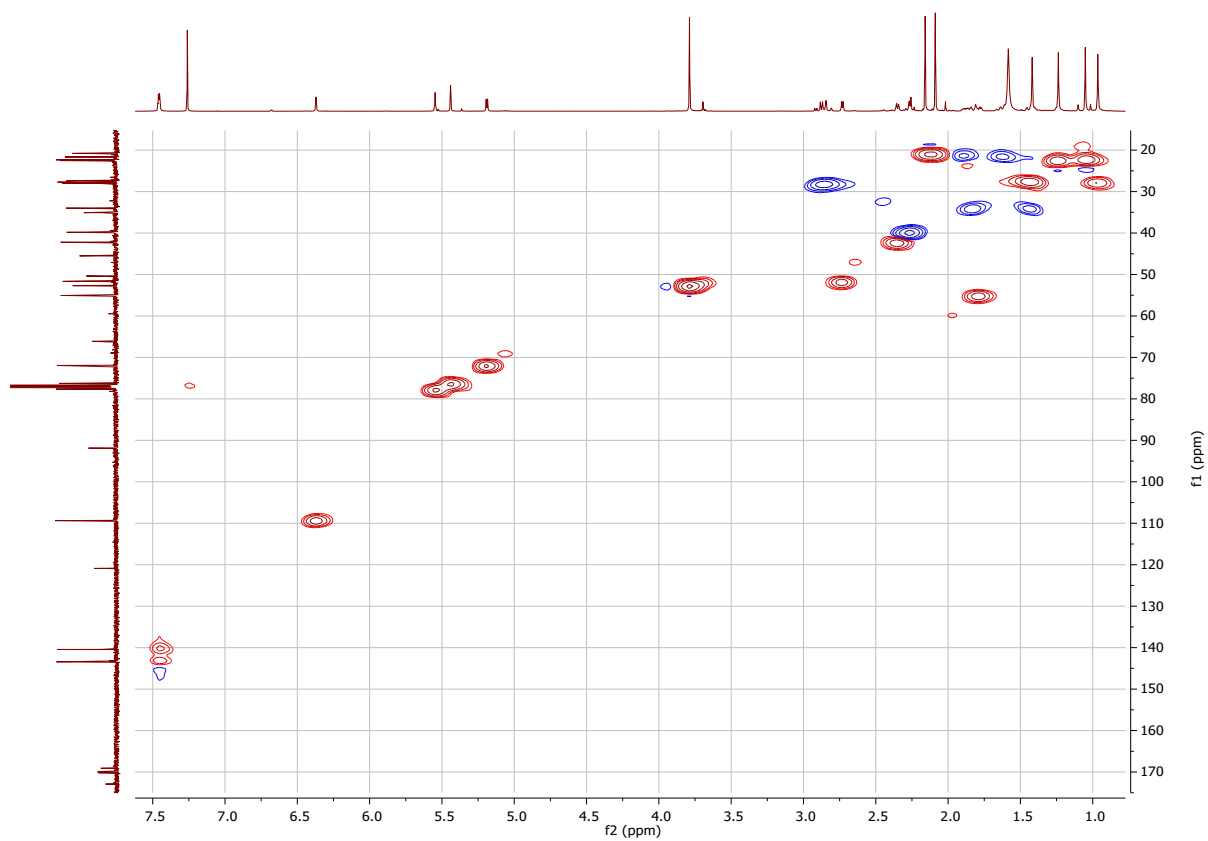

Figure S33. HSQC spectrum of swetemicrolide D (4) in  $\text{CDCl}_3$

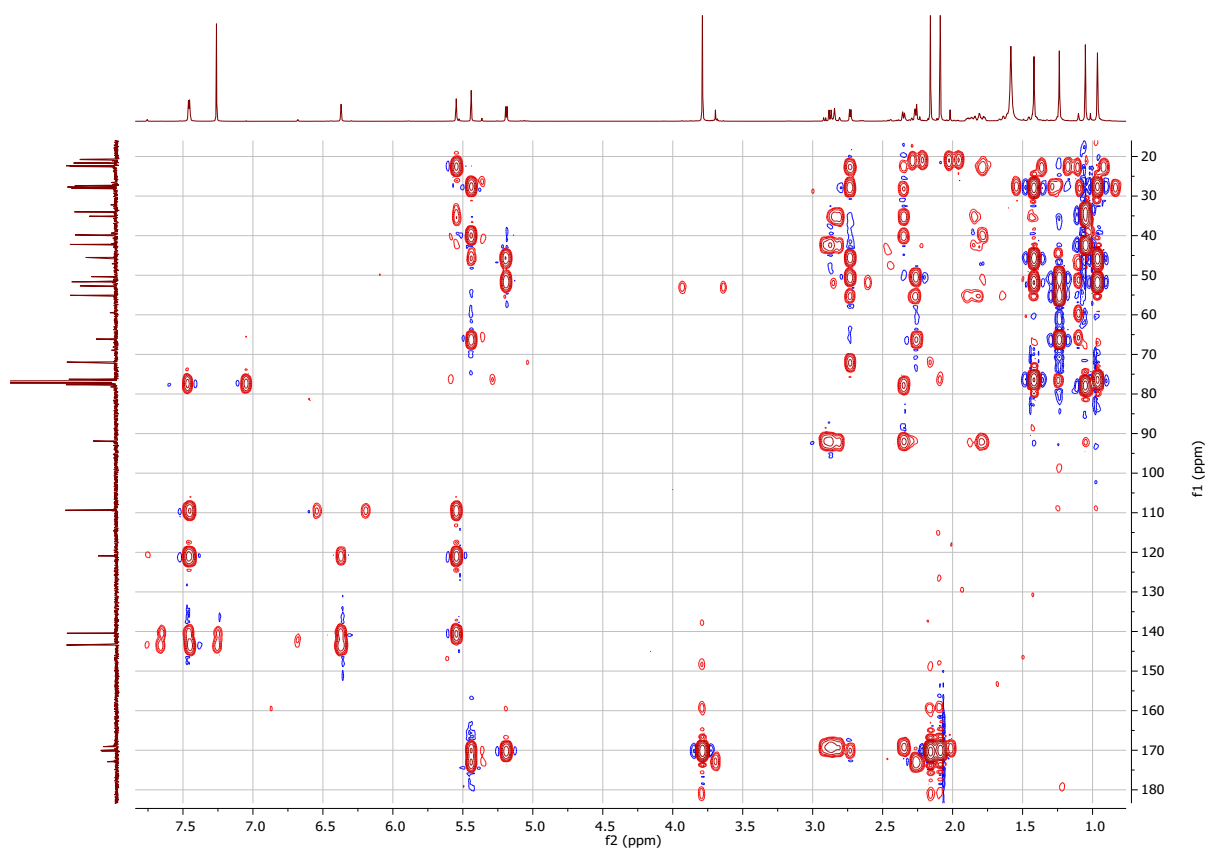

Figure S34. HMBC spectrum of swetemicrolide D (4) in  $\text{CDCl}_3$

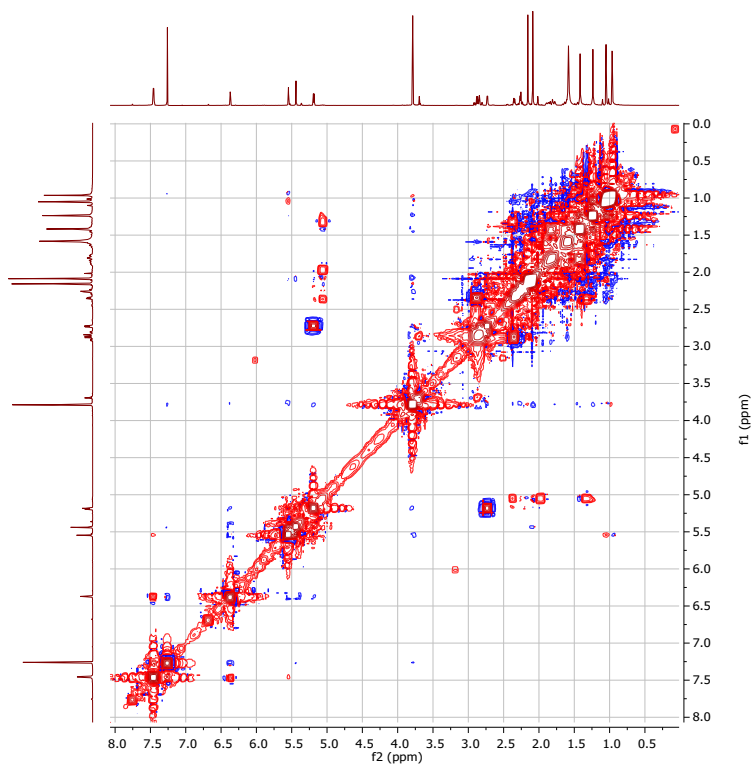

**Figure S35.**  $^1\text{H} - ^1\text{H}$  COSY spectrum of swetemicrolide D (**4**) in  $\text{CDCl}_3$

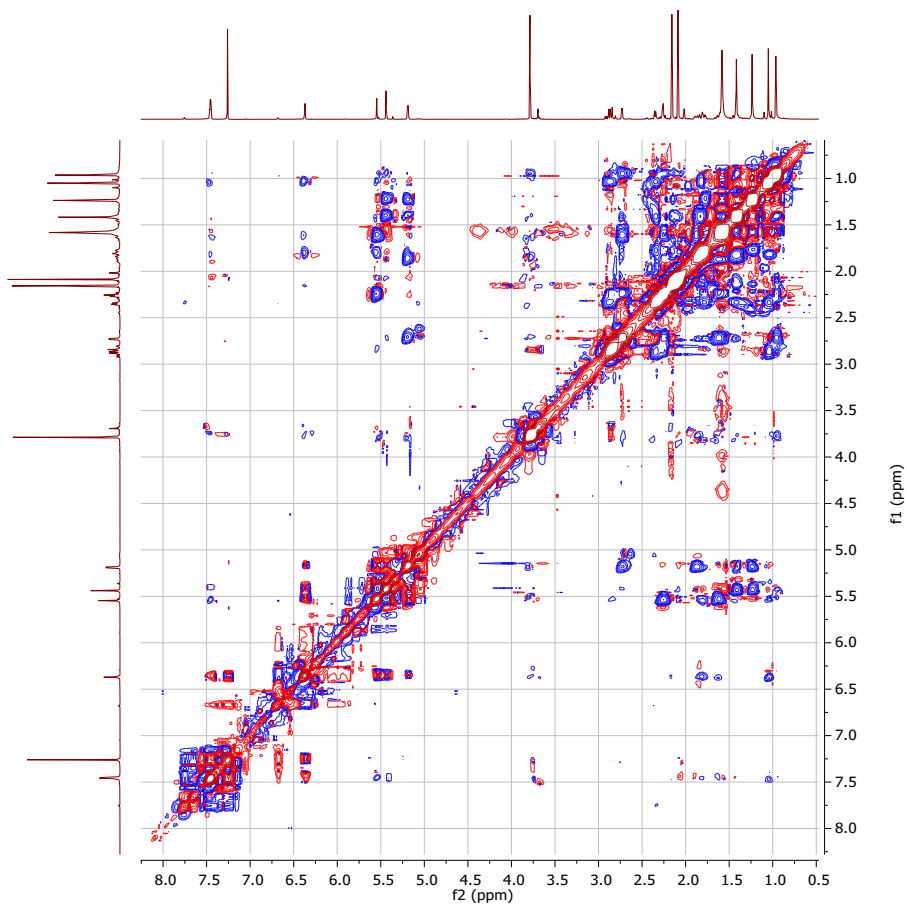

**Figure S36.** NOESY spectrum of swetemicrolide D (**4**) in  $\text{CDCl}_3$

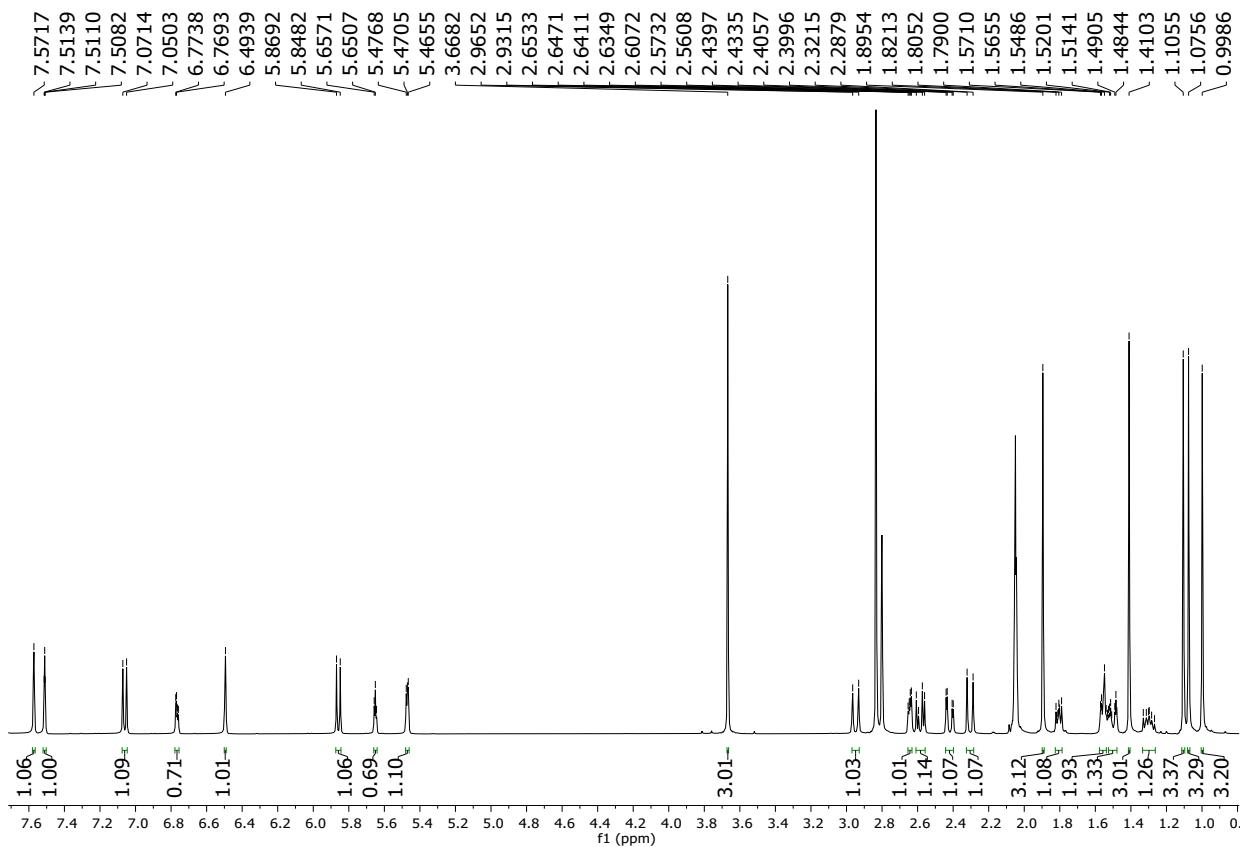

Figure S37.  $^1\text{H}$  NMR spectrum of swimahogin A (**5**) in acetone- $d_6$  (500MHz)

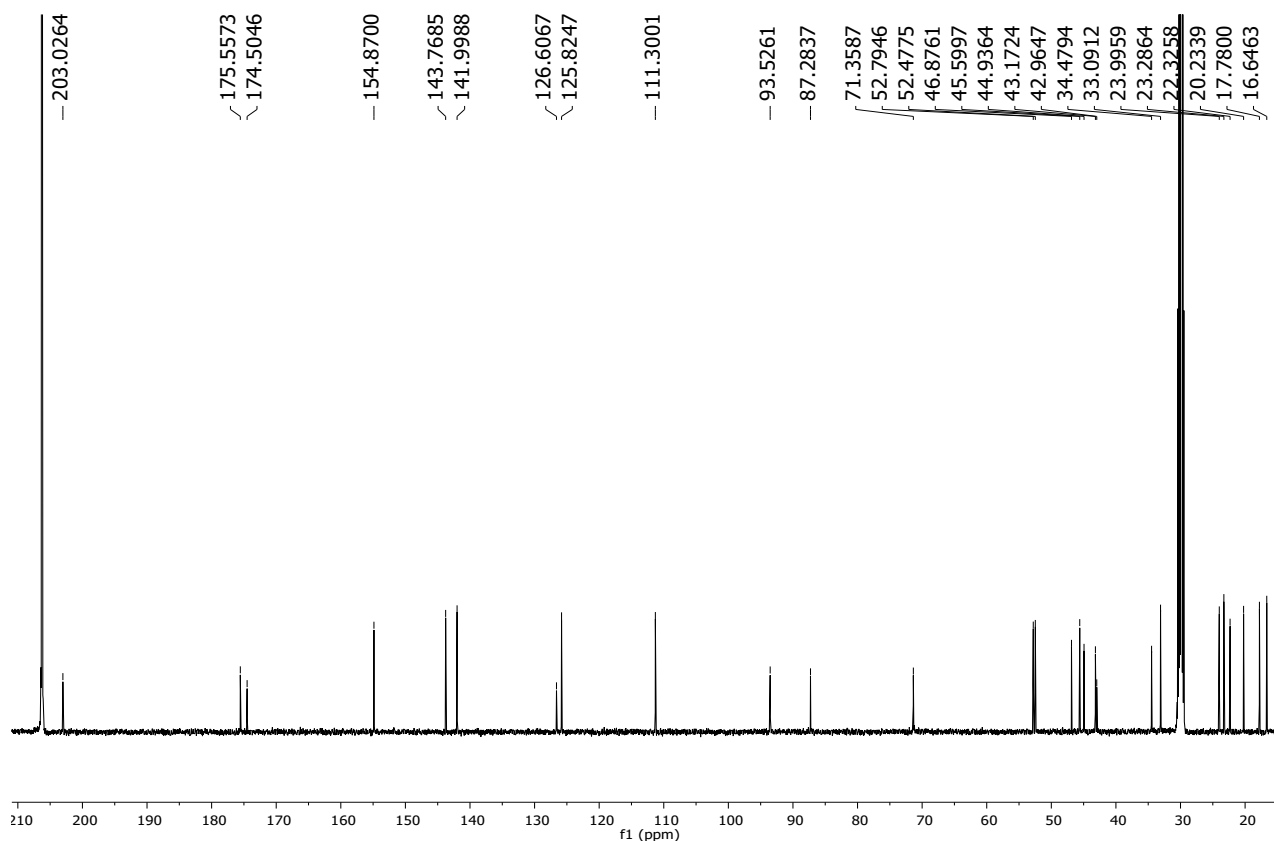

Figure S38.  $^{13}\text{C}$  NMR spectrum of swimahogin A (**5**) in acetone- $d_6$  (125MHz)

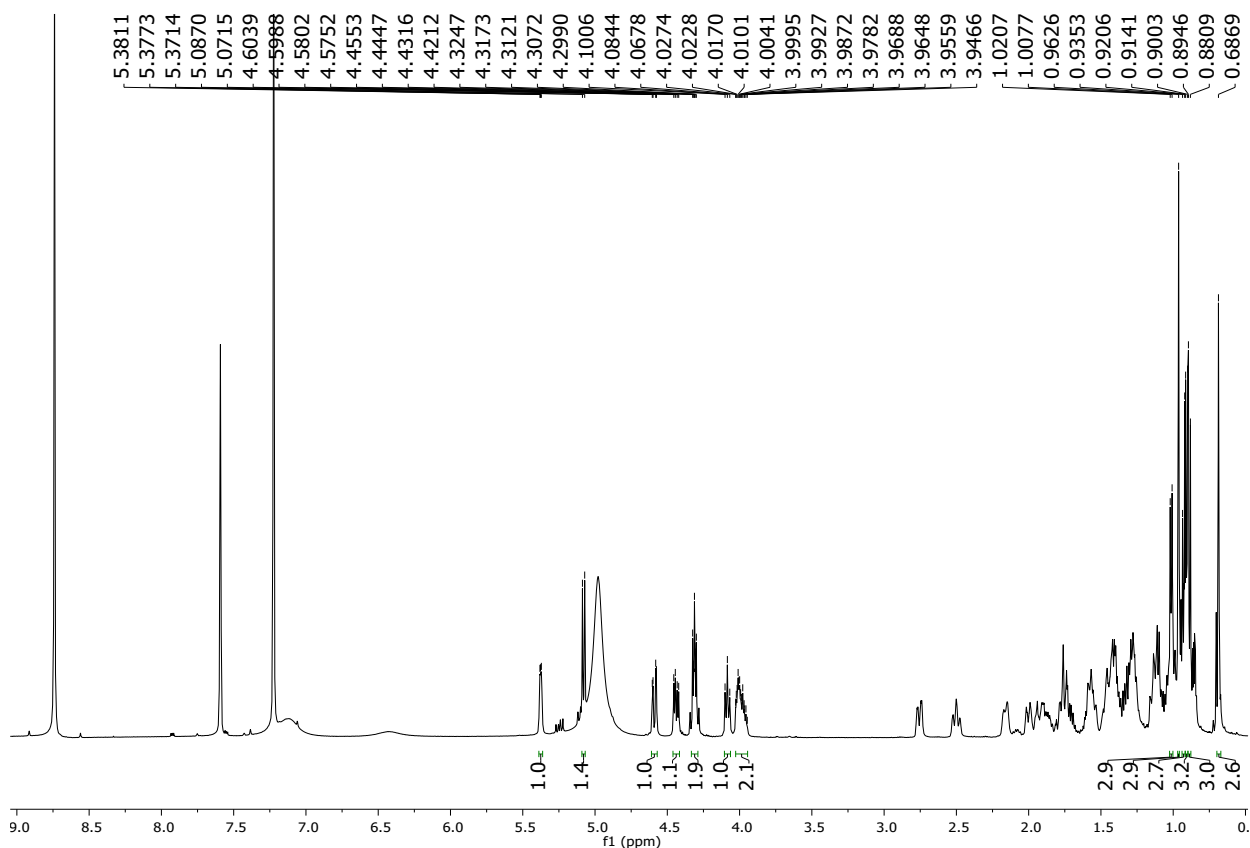

Figure S39.  $^1\text{H}$  NMR spectrum of  $\beta$ -sitosterol-3- $O$ - $\beta$ -D-glucopyranoside (**6**) in pyridine- $d_5$  (500MHz)

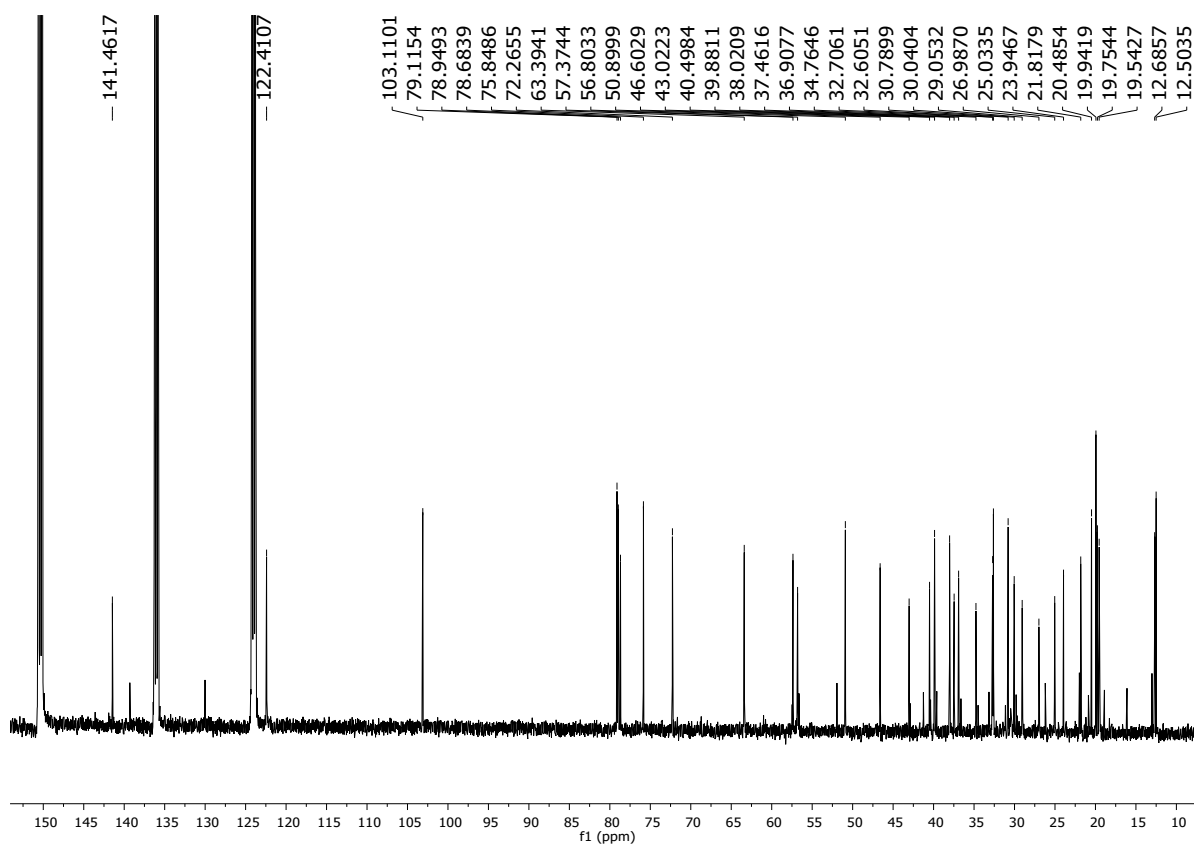

Figure S40.  $^{13}\text{C}$  NMR spectrum of  $\beta$ -sitosterol-3- $O$ - $\beta$ -D-glucopyranoside (**6**) in pyridine- $d_5$  (125MHz)

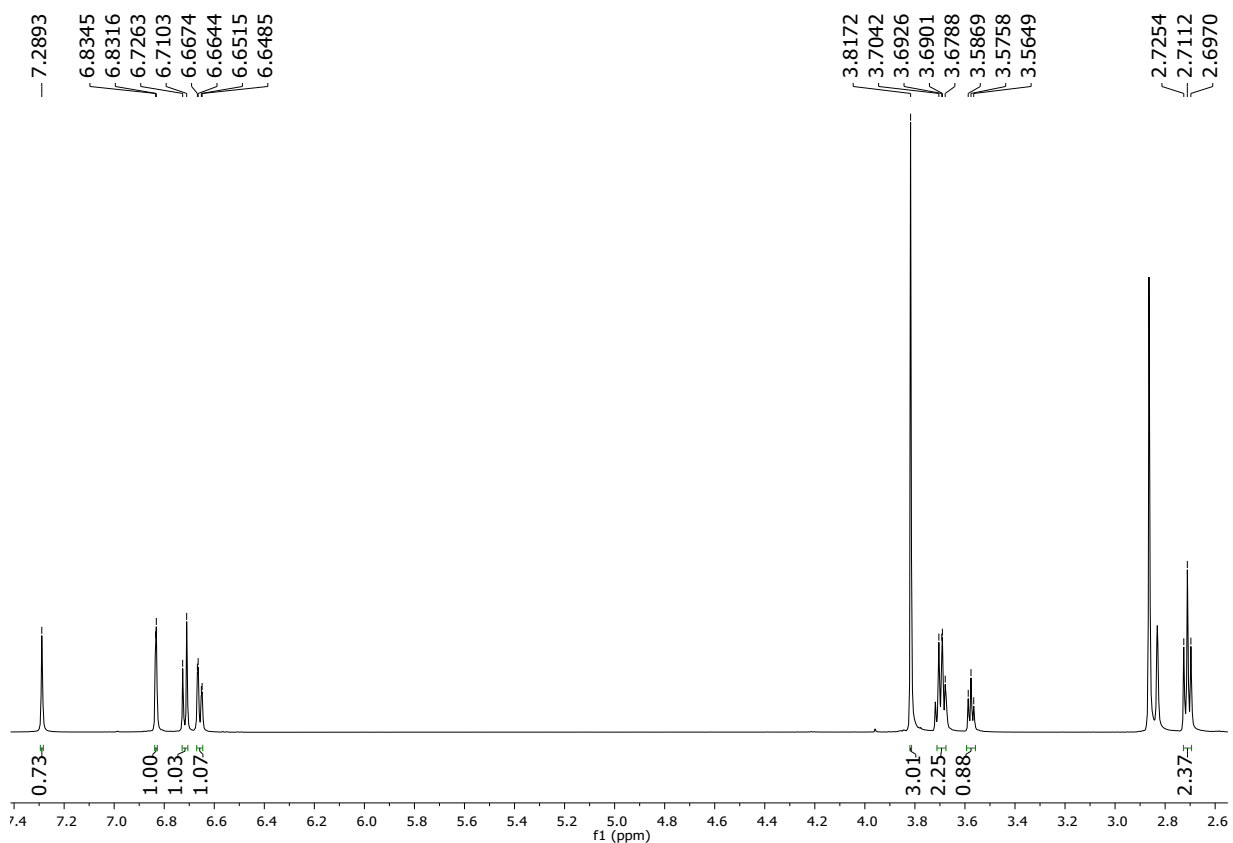

**Figure S41.**  $^1\text{H}$  NMR spectrum of homovanillyl alcohol (**7**) in acetone- $d_6$  (500MHz)

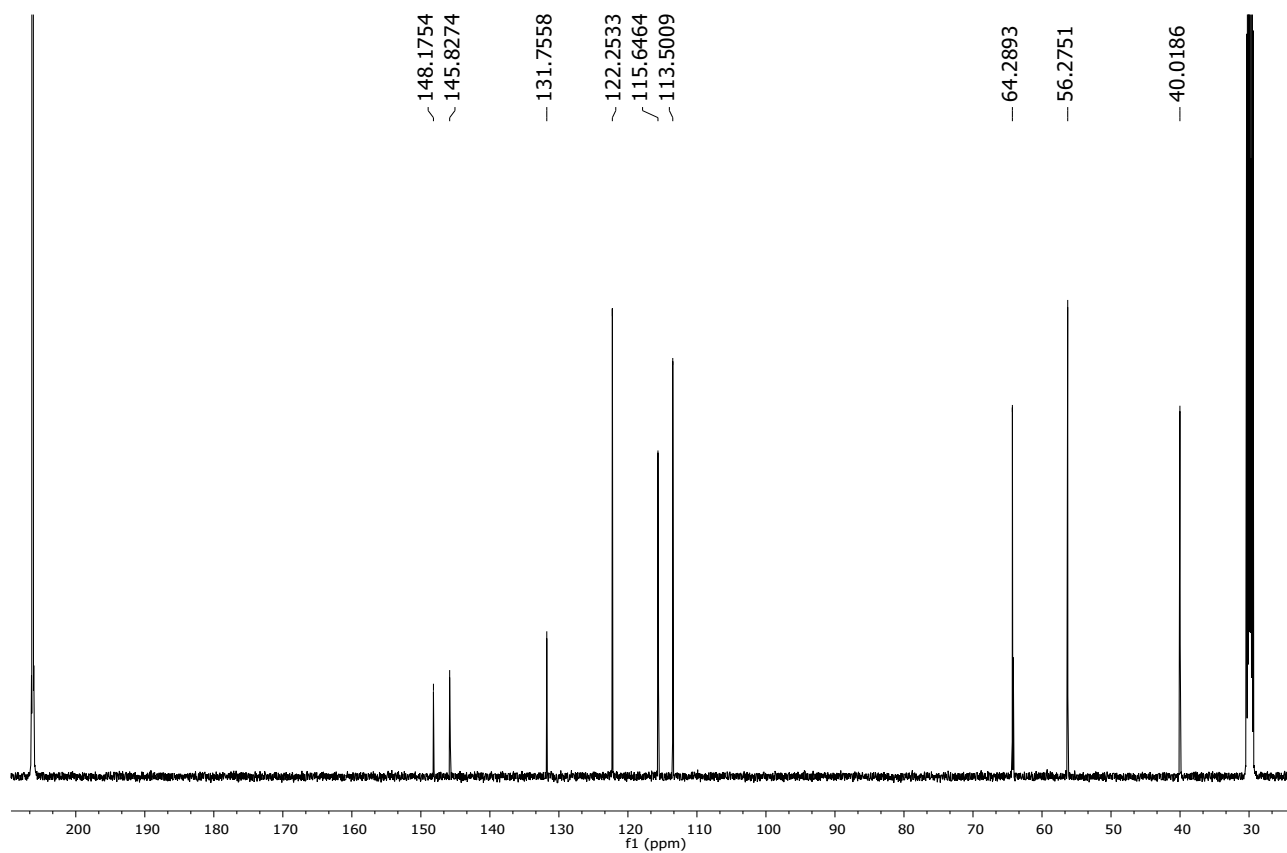

**Figure S42.**  $^{13}\text{C}$  NMR spectrum of homovanillyl alcohol (**7**) in acetone- $d_6$  (125MHz)
